# Supplementary material for: Identification of a Hypoxia-Related Molecular Classification and Hypoxic Tumor Microenvironment Signature for Predicting the Prognosis of Patients with Triple-Negative Breast Cancer
Source: Front Oncol. 2021 Aug 19;11:700062. doi: 10.3389/fonc.2021.700062 (PMC8416750; doi:10.3389/fonc.2021.700062)
Supplement: Supplementary file 7 [file Table_6.xlsx]

## Sheet: Supplementary Table 6
MetProbes	ExpGenes	Cor	Cor.pvalue	Groups
cg16587010	ACOX2	-0.50955	1.25392e-06	TSS1500
cg13705284	ACOX2	-0.319676	0.00335381	TSS1500
cg23652987	ACOX2	0.0965115	0.384685	Body
cg12075202	ACOX2	-0.22965	0.0369685	Body
cg16869862	ACOX2	0.0171907	0.877216	Body
cg23325384	ACSL3	-0.190315	0.0848559	TSS1500
cg09708286	ACSL3	-0.0121531	0.913049	Body
cg01233736	ACSL3	0.0721842	0.515919	TSS200
cg03040554	ACSL3	0.127744	0.249246	Body
cg15481227	AGL	-0.0448974	0.686366	TSS1500
cg10772169	AGL	-0.277234	0.0113869	TSS1500
cg09551172	AGL	0.236052	0.0319099	TSS1500
cg14453641	AGL	0.158096	0.153197	TSS1500
cg18377446	AGL	-0.0557491	0.616009	Body
cg25758167	AGL	-0.466794	1.10474e-05	TSS1500
cg13614946	AGL	0.184438	0.0950681	TSS1500
cg02048807	AHNAK2	-0.213047	0.0533003	Body
cg16097532	AHNAK2	0.200873	0.0687213	Body
cg06799735	AHNAK2	-0.712145	2e-12	Body
cg19901468	AHNAK2	0.202993	0.0658024	Body
cg01513078	AHNAK2	-0.735695	2e-12	Body
cg01238264	AHNAK2	0.338924	0.00181938	Body
cg04908382	AHNAK2	0.2536	0.0209438	Body
cg09796640	AHNAK2	-0.214727	0.0514165	Body
cg05376485	AHNAK2	0.265333	0.0155722	Body
cg14403583	AHNAK2	0.304143	0.00535027	Body
cg04725566	AHNAK2	0.371269	0.000597488	Body
cg07828276	AHNAK2	-0.0715755	0.519472	TSS200
cg18958585	AHNAK2	-0.0604407	0.587277	TSS1500
cg16396153	AHNAK2	0.340057	0.00175298	Body
cg26082174	AHNAK2	-0.183431	0.0969124	TSS1500
cg07071690	AHNAK2	0.192078	0.081969	Body
cg03006175	AHNAK2	0.239516	0.0294261	Body
cg17340268	AHNAK2	0.0463037	0.677079	Body
cg21868779	AHNAK2	-0.151988	0.169863	TSS1500
cg10207355	AHNAK2	0.0443096	0.690261	Body
cg11138227	AHNAK2	-0.70929	2e-12	Body
cg01412886	AHNAK2	0.043617	0.694862	TSS1500
cg01987417	AHNAK2	-0.260958	0.01718	Body
cg14046988	AHNAK2	0.301625	0.00575868	Body
cg13108289	AHNAK2	0.220016	0.0458383	Body
cg14976660	AHNAK2	-0.194597	0.0779816	TSS1500
cg23385208	AHNAK2	-0.430796	5.67283e-05	Body
cg27161497	AHNAK2	0.248646	0.0236503	Body
cg07450030	AHNAK2	0.317367	0.00360024	Body
cg02719508	AHNAK2	0.0901096	0.417111	TSS1500
cg13199958	AKAP12	0.259393	0.0181201	Body
cg04958227	AKAP12	0.243	0.0270946	Body
cg20407861	AKAP12	0.0451282	0.684838	Body
cg08457315	AKAP12	0.0461358	0.678185	Body
cg22822893	AKAP12	0.212229	0.0542391	Body
cg21047322	AKAP12	0.367323	0.000688516	Body
cg07804773	AKAP12	0.145964	0.187577	Body
cg04516896	AKAP12	0.0988314	0.374046	Body
cg27045481	AKAP12	0.373284	0.00055539	Body
cg27583671	AKAP12	0.280026	0.0105613	Body
cg01895992	AKAP12	0.168843	0.126894	Body
cg12061236	AKAP12	-0.115088	0.299546	TSS1500
cg26390965	AKAP12	0.322971	0.00302828	Body
cg13033898	AKAP12	-0.168276	0.128189	TSS200
cg20068535	AKAP12	-0.135616	0.221078	TSS200
cg05826214	AKAP12	0.267117	0.0148702	Body
cg01555431	AKAP12	0.0357458	0.747891	Body
cg03609148	AKAP12	0.237899	0.030564	Body
cg24748868	AKAP12	0.0823433	0.458504	Body
cg20047076	AKAP12	0.12405	0.263285	Body
cg22942200	AKAP12	-0.181332	0.100845	TSS200
cg18873763	AKAP12	0.313694	0.00402582	Body
cg03651715	AKAP12	0.305445	0.00514952	Body
cg15742468	AKAP12	0.0846522	0.445967	Body
cg11348249	AKAP12	-0.153352	0.166029	TSS1500
cg17543885	AKAP12	-0.0683431	0.538547	Body
cg11728201	AKAP12	0.202133	0.0669749	Body
cg10270306	AKAP12	-0.126338	0.254528	TSS200
cg20568219	AKAP12	0.169892	0.124524	Body
cg09005762	AKAP12	0.049767	0.654415	Body
cg18144247	AKAP12	0.0169808	0.878705	Body
cg10134496	AKAP12	0.242685	0.0272986	Body
cg01154527	AKAP12	0.244952	0.0258584	Body
cg20424065	AKAP12	0.134797	0.223898	Body
cg09846917	AKAP12	0.0887242	0.424331	Body
cg17520539	AKAP12	-0.0806851	0.467627	TSS1500
cg06277849	ANKRD37	-0.124722	0.260693	TSS1500
cg11595794	ANKRD37	-0.0297846	0.788865	TSS1500
cg24220767	ANKRD37	0.134734	0.224116	TSS200
cg10736309	ANKRD37	-0.0881685	0.428001	TSS200
cg26926904	ANKRD37	0.0509424	0.646793	TSS1500
cg26741686	ANKRD37	-0.100605	0.364774	Body
cg05725892	ANKRD37	0.0136224	0.902576	TSS1500
cg06914837	ANKRD37	-0.0525377	0.636507	Body
cg10257478	ATF1	0.0346543	0.755345	TSS200
cg15877906	ATF1	-0.108686	0.328043	TSS200
cg03803784	ATF1	0.00526846	0.962289	TSS1500
cg20456276	ATF1	-0.0255133	0.818908	TSS200
cg04854025	ATF1	0.0576802	0.603823	TSS1500
cg23940169	ATF1	-0.109904	0.322622	TSS200
cg26116103	ATF1	-0.0784602	0.480023	TSS200
cg00211110	ATF1	0.168129	0.128526	TSS200
cg16705383	BIRC3	-0.0683224	0.539397	TSS200
cg08847737	BIRC3	0.214768	0.0513701	Body
cg14481222	BIRC3	-0.297972	0.00640007	TSS1500
cg05338083	BIRC3	-0.312581	0.00416331	TSS1500
cg16837326	BIRC3	-0.149133	0.178097	TSS200
cg04279695	BIRC3	-0.0709038	0.523408	TSS200
cg23565749	BIRC3	-0.275303	0.0119905	TSS200
cg14296561	BIRC3	-0.157466	0.154856	Body
cg18384926	C15orf48	-0.252655	0.0214383	TSS200
cg21839138	C15orf48	-0.372423	0.000573025	TSS200
cg25137030	C15orf48	-0.310986	0.00436778	TSS200
cg11287660	C15orf48	-0.164509	0.137235	TSS200
cg06751446	C15orf48	-0.387872	0.000322889	TSS1500
cg00316777	CA2	-0.212669	0.0537319	Body
cg23963118	CA2	0.0160573	0.885259	TSS1500
cg25450061	CA2	-0.243818	0.0265702	Body
cg08872550	CA2	-0.0799295	0.471817	TSS1500
cg09722643	CA2	-0.0132866	0.904968	TSS1500
cg02799643	CAV2	-0.515071	9.28213e-07	TSS1500
cg12739419	CAV2	-0.440431	3.72244e-05	Body
cg16553024	CAV2	-0.000545737	0.99616	TSS1500
cg05166801	CAV2	-0.0488435	0.660429	Body
cg16260298	CAV2	-0.220709	0.0451465	Body
cg04696780	CAV2	0.0358297	0.747319	TSS200
cg25274503	CAV2	-0.132909	0.230989	Body
cg11613243	CCNE1	0.225242	0.0408295	TSS1500
cg12028842	CCNE1	-0.247408	0.0243718	Body
cg16740744	CCNE1	-0.223311	0.0426241	TSS1500
cg20039571	CCNE1	0.109273	0.324748	Body
cg15828085	CCNE1	-0.045674	0.681231	TSS1500
cg15455156	CDKN1B	-0.212795	0.0535877	Body
cg16191024	CDKN1B	0.220793	0.0450632	TSS1500
cg05121697	CDKN1B	-0.175748	0.111918	TSS1500
cg06197769	CDKN1B	-0.293208	0.00733162	TSS1500
cg21016902	CDKN1B	0.118572	0.285077	TSS1500
cg02554391	CDKN1B	-0.299043	0.00620582	Body
cg10774305	CDKN1B	0.203455	0.0651802	TSS200
cg01745510	CDKN1B	0.173041	0.117617	TSS200
cg27567401	COL12A1	0.0266781	0.810457	TSS200
cg26780404	COL12A1	0.0331957	0.765762	TSS1500
cg15089846	COL12A1	0.245204	0.0257025	Body
cg15066504	COL12A1	0.225578	0.0405239	Body
cg11912543	COL12A1	0.145649	0.188539	TSS200
cg08009622	COL12A1	-0.222955	0.0429628	TSS1500
cg25290482	COL12A1	0.252109	0.0217286	Body
cg04074140	COL12A1	-0.0709248	0.523284	TSS200
cg20129242	COL12A1	-0.00919357	0.934186	TSS200
cg01983421	COL12A1	-0.0132656	0.905118	Body
cg16633701	COL12A1	0.295202	0.0069281	Body
cg20476329	COL12A1	-0.0686789	0.53655	Body
cg13395133	COL12A1	0.226166	0.0399938	Body
cg05587282	COL12A1	0.157163	0.155917	TSS1500
cg17444409	COL12A1	0.0167079	0.880641	Body
cg11964364	COL12A1	0.253663	0.0209112	Body
cg06666175	COL12A1	0.133727	0.227624	TSS1500
cg24897255	COL12A1	0.0586457	0.59777	TSS200
cg04611812	COL12A1	0.0039461	0.971768	Body
cg09348948	COL12A1	-0.0446455	0.688034	Body
cg12488810	COL12A1	0.227614	0.0387121	Body
cg26997327	COL12A1	-0.0470383	0.672246	Body
cg07004443	COL12A1	-0.0836867	0.451186	TSS1500
cg13319757	COL12A1	-0.014462	0.896599	Body
cg10364041	COL12A1	-0.0662651	0.55099	TSS200
cg10470588	COL12A1	0.00971832	0.930435	TSS200
cg19461644	COL15A1	-0.0337098	0.761813	Body
cg05347613	COL15A1	0.0510054	0.646386	Body
cg13408655	COL15A1	0.28456	0.00933202	Body
cg14424210	COL15A1	0.0865413	0.435853	Body
cg13593548	COL15A1	-0.0215356	0.846506	Body
cg13865810	COL15A1	0.0630536	0.57049	Body
cg18115656	COL15A1	-0.0321775	0.772342	TSS200
cg13893707	COL15A1	-0.0136854	0.902128	Body
cg13952031	COL15A1	0.047752	0.667565	TSS200
cg12933162	COL15A1	-0.145313	0.189568	TSS1500
cg00089695	COL15A1	-0.00411402	0.970564	Body
cg13927769	COL15A1	-0.252634	0.0214494	Body
cg14546062	COL15A1	0.0847152	0.445627	Body
cg14375849	COL15A1	0.0425885	0.701715	Body
cg03651021	CSGALNACT1	0.0320725	0.773064	Body
cg11155735	CSGALNACT1	-0.0724361	0.514453	TSS1500
cg03514770	CSGALNACT1	-0.134965	0.223318	Body
cg15379858	CSGALNACT1	-0.0760883	0.493429	TSS1500
cg11095122	CSGALNACT1	-0.200139	0.069757	TSS1500
cg11303988	CSGALNACT1	-0.155451	0.160256	Body
cg06699216	CSGALNACT1	0.0463247	0.676941	Body
cg14854503	CSGALNACT1	-0.0317577	0.775233	TSS200
cg11505841	CSGALNACT1	-0.0836657	0.4513	TSS1500
cg06108374	CSGALNACT1	-0.0619411	0.577319	Body
cg26388668	CSGALNACT1	-0.0451702	0.68456	Body
cg15123742	CSGALNACT1	-0.0242433	0.82748	Body
cg06562184	CSGALNACT1	0.0201923	0.855979	Body
cg18741439	CSGALNACT1	0.11853	0.285249	Body
cg09816366	CSGALNACT1	0.0946014	0.394196	Body
cg22260478	CTGF	-0.169409	0.12561	TSS1500
cg15897310	CTGF	-0.149784	0.176195	TSS200
cg01813033	CTGF	-0.0660762	0.552128	TSS200
cg18849840	CTGF	-0.00824902	0.940943	TSS200
cg00516030	CTGF	-0.269657	0.0139185	TSS1500
cg18222609	CTGF	-0.367869	0.000675213	Body
cg17359975	CTGF	-0.296272	0.00671968	TSS1500
cg22843613	CTGF	-0.0293648	0.791774	Body
cg14623917	CTGF	-0.122938	0.267616	Body
cg24684168	CTGF	-0.11895	0.283537	Body
cg03938800	DCAF6	0.0589186	0.596064	Body
cg24449463	DCAF6	0.177931	0.107481	Body
cg24155792	DCAF6	0.136518	0.217998	Body
cg25738037	DCAF6	0.167688	0.129541	Body
cg06973234	DSC2	-0.169745	0.124854	Body
cg15538809	DSC2	0.307208	0.00488825	Body
cg24505073	DSC2	-0.568091	3.87795e-08	TSS1500
cg22017726	DSC2	-0.3032	0.00533124	Body
cg13870990	DSC2	-0.0794047	0.474739	TSS200
cg05110943	DSC2	-0.240124	0.0290069	TSS200
cg05662655	DSC2	-0.666324	2e-12	TSS1500
cg08611430	EGR1	0.212103	0.0543847	TSS200
cg23029363	EGR1	-0.311469	0.00430497	Body
cg04616401	EGR1	-0.204714	0.0635074	TSS200
cg19544946	EGR1	0.0283363	0.798913	TSS200
cg12443481	EGR1	-0.0264894	0.812105	TSS200
cg21138501	EGR1	0.166513	0.13228	TSS1500
cg26069252	EGR1	0.195458	0.0766555	TSS1500
cg00850167	EGR1	-0.0524117	0.637317	TSS1500
cg24019521	EGR1	0.23536	0.0324274	TSS200
cg13009654	EGR1	-0.382058	0.000401947	Body
cg09395034	EGR1	-0.0630746	0.570361	TSS200
cg26819793	EGR1	0.12701	0.251996	TSS1500
cg09102257	EGR1	-0.293963	0.00717632	Body
cg19729803	EGR1	-0.363104	0.000799737	Body
cg07336840	EGR1	-0.0925444	0.404595	Body
cg01290504	EGR1	0.0215776	0.84621	TSS200
cg08392484	ELL2	-0.0443936	0.689704	Body
cg15114202	ELL2	-0.199572	0.0705645	Body
cg03176996	ELL2	-0.0153226	0.890479	Body
cg11150614	ELL2	-0.0504597	0.649919	Body
cg12324598	ELL2	0.100961	0.363069	Body
cg10179238	ELL2	0.0999748	0.367795	Body
cg19493250	ELL2	-0.0453591	0.683311	Body
cg10483112	ELL2	0.131691	0.23483	Body
cg18890825	ELL2	-0.0185341	0.8677	Body
cg04452110	ELL2	-0.236977	0.0310019	TSS200
cg19023977	ELL2	0.099597	0.369615	Body
cg11571761	ELL2	-0.0179883	0.871563	TSS1500
cg16998950	ELL2	-0.271903	0.0131215	Body
cg00335744	ELL2	0.122119	0.270833	TSS1500
cg14442492	ELL2	0.0715755	0.519472	Body
cg14456395	ELL2	0.120797	0.276086	Body
cg16656078	ELL2	0.0109777	0.921437	Body
cg20952358	ELL2	-0.127136	0.251523	TSS200
cg19419291	ELL2	0.0199614	0.857609	Body
cg15685672	ELL2	0.246169	0.0251121	TSS1500
cg21091679	ELL2	-0.0688888	0.535303	TSS1500
cg19753607	ELL2	-0.00753537	0.946051	Body
cg20415170	ELL2	-0.0175895	0.874389	TSS1500
cg07883722	ELL2	0.28351	0.0096048	Body
cg26704948	ENPP1	-0.379833	0.000436647	TSS200
cg17413252	ENPP1	0.307691	0.0048188	Body
cg09035093	ENPP1	0.0520129	0.639883	Body
cg21975007	ENPP1	0.239075	0.0297328	TSS200
cg13333737	ENPP1	-0.076844	0.489137	TSS200
cg17534945	ENPP1	-0.0613534	0.580943	TSS200
cg11412046	ENPP1	0.0655934	0.555042	Body
cg04296147	ENPP1	0.116872	0.292078	Body
cg01661247	ENPP1	0.256349	0.0195597	TSS1500
cg21851142	ENPP1	0.00887872	0.936438	TSS200
cg10683054	ENPP1	-0.219178	0.0465032	TSS200
cg14306261	ENPP1	-0.108602	0.327744	TSS1500
cg14610633	ENPP1	-0.310398	0.00444534	Body
cg05417985	ENPP1	0.264787	0.0157925	TSS1500
cg13997788	EPAS1	0.0240124	0.829099	Body
cg12608132	EPAS1	-0.204987	0.0631496	Body
cg21276379	EPAS1	-0.0163091	0.883471	TSS1500
cg01960526	EPAS1	-0.259814	0.0176916	TSS200
cg08871383	EPAS1	-0.109137	0.326027	TSS200
cg25124739	EPAS1	-0.0626758	0.572805	Body
cg11501862	EPAS1	-0.157592	0.154523	TSS200
cg13681847	EPAS1	-0.0126149	0.909756	Body
cg26627511	EPAS1	-0.180408	0.102615	Body
cg09240515	EPAS1	-0.0383905	0.729927	Body
cg24460563	EPAS1	-0.209479	0.0574923	Body
cg10507988	EPAS1	0.215755	0.05029	Body
cg24046888	EPAS1	-0.08927	0.421478	Body
cg05943554	EPAS1	-0.00293858	0.978994	Body
cg19311375	EPAS1	-0.395848	0.000237606	Body
cg15129144	EPAS1	-0.104719	0.345413	Body
cg07901411	EPAS1	-0.103921	0.349116	Body
cg17518825	EPAS1	-0.0033164	0.976284	TSS1500
cg12485219	EPAS1	0.278011	0.0111517	Body
cg01313320	EPAS1	-0.238277	0.0302947	Body
cg20623601	EPAS1	-0.102892	0.353926	Body
cg00097800	EPAS1	0.161664	0.144045	Body
cg00330888	EPAS1	-0.0435549	0.695818	TSS1500
cg06093355	EPAS1	-0.17111	0.121817	Body
cg10107473	EPAS1	0.149322	0.177543	Body
cg25036456	FGD6	0.0409093	0.712954	Body
cg00912772	FGD6	-0.200957	0.0686038	Body
cg21182715	FGD6	-0.184879	0.09427	Body
cg04874286	FGD6	-0.022921	0.83676	Body
cg01493728	FGD6	-0.247177	0.0245084	Body
cg10917910	FGD6	-0.182444	0.0987455	Body
cg01265660	FGD6	-0.00698963	0.949958	Body
cg07737802	FGD6	0.0859536	0.438986	Body
cg16526732	FGD6	-0.0988833	0.373068	Body
cg02013274	FOSL2	0.0938458	0.397998	TSS1500
cg06520715	FOSL2	0.196633	0.0748736	TSS1500
cg19626761	FOSL2	-0.0836447	0.451414	Body
cg08836542	FOSL2	-0.342408	0.00162222	Body
cg23522611	FOSL2	-0.166786	0.13164	Body
cg25784219	FOSL2	-0.238109	0.0304142	Body
cg06911519	FOSL2	0.0475001	0.669216	TSS200
cg24397007	FOSL2	-0.581588	1.51175e-08	Body
cg03327468	FOSL2	-0.17961	0.104163	TSS1500
cg11133114	FOSL2	0.0239495	0.829541	TSS1500
cg08351105	FOSL2	0.043491	0.6957	TSS1500
cg19941230	GNA13	-0.0598631	0.590177	Body
cg03182819	GNA13	-0.0115864	0.917092	TSS1500
cg27490352	GNA13	-0.221632	0.0442376	TSS1500
cg09070201	GNA13	-0.00692666	0.950409	Body
cg02429674	GNA13	0.145775	0.188154	TSS1500
cg24747122	GNA13	-0.0314638	0.777259	TSS1500
cg17413194	GNA13	0.0420847	0.70508	TSS1500
cg25554496	GNA13	-0.0856597	0.440557	Body
cg23423852	GNA13	0.230994	0.0358547	TSS1500
cg02389067	GNA13	0.0710717	0.522422	Body
cg00550797	GPR56	-0.332207	0.00226173	TSS200
cg01410801	GPR56	-0.390517	0.000291903	TSS1500
cg25645462	GPR56	-0.361656	0.000841552	TSS1500
cg10103630	GPR56	-0.409198	0.000139881	TSS1500
cg09087462	GPRC5A	-0.0295118	0.790756	TSS200
cg13573474	GPRC5A	0.00816506	0.941544	TSS1500
cg03353445	GPRC5A	-0.233135	0.0341377	TSS1500
cg06776256	GPRC5A	-0.117187	0.290773	TSS1500
cg11644746	GPRC5A	-0.197851	0.0730634	TSS200
cg24765748	GPRC5A	-0.226859	0.0393764	Body
cg09007058	GPRC5A	-0.06022	0.58796	TSS200
cg18849169	GPX3	-0.109504	0.323722	TSS1500
cg21516478	GPX3	-0.115465	0.297954	Body
cg13081720	GPX3	-0.229608	0.0370038	TSS200
cg12684668	GPX3	-0.0304563	0.784217	Body
cg17820459	GPX3	-0.0719743	0.517143	Body
cg08891071	GPX3	-0.171613	0.120711	TSS200
cg26891370	GPX3	-0.179841	0.103713	Body
cg22005145	GPX3	-0.174741	0.114013	TSS1500
cg10802379	GPX3	0.0305403	0.783637	Body
cg25884666	GRSF1	0.00938248	0.932836	Body
cg02781268	GRSF1	0.0340666	0.759368	TSS1500
cg13416310	GULP1	-0.332879	0.00221349	TSS1500
cg15260721	GULP1	-0.312791	0.00413705	TSS1500
cg24654264	GULP1	-0.278788	0.0109208	TSS200
cg16256414	GULP1	-0.155598	0.159858	TSS200
cg07828741	GULP1	-0.0953151	0.390626	TSS1500
cg17141115	GULP1	-0.251921	0.0218299	TSS1500
cg13944644	GULP1	0.31319	0.00408757	Body
cg17931661	GULP1	-0.165967	0.133566	TSS1500
cg16947583	GULP1	0.399395	0.000206823	Body
cg23068712	GULP1	-0.201545	0.0677854	TSS1500
cg18998138	GULP1	-0.188174	0.0884697	TSS200
cg09563893	GULP1	0.203896	0.0645907	Body
cg20365074	GULP1	-0.316947	0.00364674	TSS200
cg09987740	GULP1	-0.160887	0.146001	TSS200
cg11041835	GULP1	-0.132352	0.232965	TSS1500
cg06187947	GULP1	-0.255132	0.0201625	TSS1500
cg14638272	GULP1	-0.367302	0.000689032	TSS200
cg00106074	GXYLT1	-0.123022	0.267287	TSS200
cg22968445	GXYLT1	-0.285546	0.00908185	TSS200
cg01256987	GXYLT1	-0.320222	0.00329782	TSS1500
cg18464274	GXYLT1	-0.176462	0.110452	Body
cg04785418	GXYLT1	-0.27794	0.0109561	TSS200
cg08682401	GXYLT1	-0.39393	0.000229053	TSS200
cg01943504	GXYLT1	-0.0470803	0.671971	TSS1500
cg06375580	GXYLT1	-0.204735	0.0634798	TSS200
cg17420585	GXYLT1	-0.169661	0.125043	TSS1500
cg17858316	GXYLT1	-0.101591	0.360071	Body
cg19428682	GXYLT1	-0.169957	0.124515	Body
cg01182555	HIF1A	0.41709	0.000101252	TSS200
cg26661257	HIF1A	-0.0429663	0.699195	Body
cg04948941	HIF1A	0.0760463	0.493668	TSS1500
cg13259118	HIF1A	-0.0371103	0.739075	TSS200
cg20580088	HIF1A	-0.0780614	0.482263	TSS1500
cg23174662	HIF1A	-0.253873	0.0208028	Body
cg07052387	HIF1A	0.00346333	0.97523	TSS1500
cg14733672	HMOX1	-0.189413	0.0863647	Body
cg15724965	HMOX1	0.0476473	0.668835	TSS200
cg10357721	HMOX1	-0.0358507	0.747176	TSS200
cg11458974	HMOX1	-0.0727299	0.512744	TSS1500
cg09240119	HMOX1	-0.181458	0.100606	TSS200
cg10375456	ICAM1	-0.0717644	0.518368	TSS1500
cg13720472	ICAM1	-0.0810839	0.465424	TSS1500
cg02497902	ICAM1	-0.229356	0.037216	TSS1500
cg02776148	ICAM1	-0.128605	0.246051	Body
cg26549174	ICAM1	-0.539293	2.33769e-07	TSS200
cg05106269	ICAM1	-0.394463	0.000250737	TSS200
cg10651168	ICAM1	-0.404622	0.000168134	Body
cg12151124	ICAM1	-0.432413	5.29007e-05	TSS200
cg08427717	ICAM1	-0.428047	6.3839e-05	TSS200
cg08607082	ICAM1	-0.231896	0.0351222	Body
cg11336311	ID3	-0.246421	0.02496	TSS1500
cg19532954	ID3	-0.301604	0.00576219	TSS200
cg20485144	ID3	-0.129529	0.242654	TSS200
cg18150584	ID3	-0.235821	0.0320817	TSS1500
cg27518976	ID3	-0.21819	0.0477044	TSS1500
cg03535461	ID3	-0.203371	0.0652929	Body
cg20850023	IGFBP3	-0.121489	0.273326	TSS1500
cg24901098	IGFBP3	0.0424835	0.702415	TSS1500
cg04690927	IGFBP3	-0.00407204	0.970865	TSS1500
cg24381682	IGFBP3	0.0931111	0.401714	TSS1500
cg04796162	IGFBP3	0.0485916	0.662073	TSS1500
cg08541297	IGFBP3	-0.0875488	0.430513	TSS1500
cg15208757	IGFBP3	-0.0266152	0.810896	TSS1500
cg16460681	IGFBP3	-0.0257546	0.816904	TSS1500
cg22800581	IGFBP3	0.0439528	0.69263	TSS1500
cg20351904	IGFBP3	-0.0789639	0.477201	Body
cg11753867	IGFBP3	-0.0333109	0.76455	TSS1500
cg07910986	IGFBP3	0.00361028	0.974159	TSS1500
cg23193639	IGFBP3	0.070484	0.525875	TSS1500
cg23455440	IGFBP3	-0.068469	0.537798	TSS1500
cg24772240	IGFBP3	0.0294068	0.791483	TSS1500
cg16875425	IGFBP3	0.0423576	0.703256	Body
cg08831744	IGFBP3	-0.00898367	0.935688	TSS1500
cg21268650	IGFBP3	-0.0383485	0.730211	TSS1500
cg22403266	IGFBP3	-0.0381596	0.73149	TSS1500
cg13977557	IGFBP3	0.0557809	0.616462	Body
cg05083496	IGFBP3	-0.0565258	0.611095	TSS1500
cg10677697	IGFBP3	-0.161916	0.143415	TSS1500
cg19536059	IGFBP3	0.0887452	0.424221	TSS1500
cg26434048	IGFBP3	-0.0222913	0.841187	TSS1500
cg03776080	IGFBP3	0.0367743	0.740889	TSS1500
cg09619271	IGFBP3	0.0160992	0.884961	TSS1500
cg12244052	IGFBP3	0.0638092	0.565873	TSS1500
cg12902183	IGFBP3	-0.166618	0.132034	Body
cg24942272	IGFBP3	0.0149029	0.893624	TSS1500
cg04727332	IGFBP3	-0.0405105	0.715632	Body
cg02120774	IGFBP3	-0.0168129	0.879896	TSS1500
cg10094651	IGFBP3	-0.0813988	0.463689	TSS1500
cg05265849	IL6	-0.0274128	0.805337	Body
cg07998387	IL6	-0.108119	0.329909	Body
cg01770232	IL6	0.0688888	0.535303	TSS1500
cg17067544	IL6	0.153184	0.166498	TSS1500
cg26061582	IL6	-0.265207	0.0156228	TSS1500
cg15703690	IL6	0.204903	0.0632595	Body
cg13104385	IL6	-0.0100332	0.928185	Body
cg05472934	IL6	-0.172705	0.11834	TSS200
cg02335517	IL6	-0.0377398	0.734334	Body
cg08065733	INHBB	-0.0378238	0.733765	Body
cg06342317	INHBB	-0.376579	0.000492364	Body
cg03175975	INHBB	-0.355128	0.00105594	Body
cg09174690	INHBB	0.00400907	0.971317	Body
cg07197823	INHBB	0.0768339	0.489945	TSS1500
cg14551952	INHBB	0.158663	0.151715	Body
cg24617696	INHBB	-0.0545107	0.62388	Body
cg07736658	INHBB	-0.296986	0.00658384	Body
cg19089337	INHBB	-0.208849	0.0582594	TSS1500
cg23397015	INHBB	-0.335712	0.00202005	TSS1500
cg26035105	INHBB	-0.278725	0.0109394	Body
cg24009722	INHBB	-0.378511	0.000458555	Body
cg04439159	INHBB	-0.206447	0.061134	Body
cg00421221	INHBB	-0.0301835	0.786105	Body
cg20925841	INHBB	-0.143004	0.196757	Body
cg03077533	INHBB	-0.220541	0.0453134	Body
cg27476576	INHBB	0.0342555	0.758074	TSS1500
cg18100653	INSIG1	0.00461777	0.966953	TSS1500
cg17927917	INSIG1	0.0101592	0.927371	TSS1500
cg15735287	INSIG1	0.222556	0.043344	Body
cg01708493	INSIG1	-0.114773	0.301512	TSS200
cg10099105	INSIG1	0.0923975	0.405344	Body
cg23053008	INSIG1	0.193254	0.0800884	Body
cg07673263	INSIG1	0.0553926	0.618922	Body
cg08142860	INSIG1	-0.238614	0.0298259	TSS200
cg01269469	INSIG1	-0.058058	0.601451	Body
cg27600497	INSIG1	-0.0796986	0.473102	Body
cg23058543	INSIG1	-0.0951891	0.391255	Body
cg04811098	INSIG1	-0.186579	0.0912411	TSS1500
cg07069934	ISG20	-0.234877	0.0327922	Body
cg17459635	ISG20	-0.246757	0.0247584	TSS1500
cg00854314	ISG20	-0.427732	6.47041e-05	TSS1500
cg19009305	ISG20	-0.29644	0.0066875	TSS1500
cg02334775	ISG20	-0.258406	0.0185764	Body
cg12017722	ISG20	-0.179757	0.103876	TSS1500
cg19574915	ISG20	-0.388985	0.000309503	Body
cg06002066	ITGA6	0.198124	0.0726625	Body
cg11027822	ITGA6	-0.00197305	0.98592	Body
cg19134705	ITGA6	-0.0467235	0.674316	Body
cg14512870	ITGA6	0.12743	0.250422	Body
cg10331637	ITGA6	-0.0569246	0.608579	TSS1500
cg15021238	ITGA6	-0.192372	0.0814955	Body
cg07466807	ITGA6	0.243965	0.026477	Body
cg24195535	ITGA6	0.0779354	0.482972	Body
cg19925054	ITGA6	-0.0824063	0.45816	Body
cg03311606	ITGA6	0.100332	0.366081	TSS200
cg06262280	ITGA6	0.148461	0.180076	Body
cg24530074	ITGA6	-0.0499559	0.653188	Body
cg15890754	ITGA6	-0.40966	0.000137289	Body
cg22061832	ITGA6	-0.3855	0.000353227	Body
cg15638366	ITGA6	-0.186516	0.0913519	Body
cg23563438	ITGA6	-0.159723	0.149201	TSS200
cg26703674	ITGA6	-0.0755539	0.497226	TSS200
cg23624723	ITGA6	-0.115225	0.299603	TSS200
cg01044293	ITGA6	-0.257084	0.0192035	Body
cg05731808	ITGA6	-0.140044	0.206256	Body
cg10155853	ITGA6	-0.105411	0.342219	Body
cg10556330	ITGA6	-0.0891025	0.423105	TSS1500
cg23726404	ITGA6	0.043638	0.694723	Body
cg17822269	ITGA6	0.109105	0.325495	Body
cg02670123	ITGA6	0.165757	0.134064	Body
cg20287862	ITM2A	0.160048	0.148138	TSS1500
cg06208111	ITM2A	0.418412	9.58446e-05	TSS1500
cg19002828	ITM2A	0.0365014	0.742744	TSS1500
cg12856407	ITM2A	-0.30555	0.00513363	Body
cg03682444	L1CAM	0.24363	0.0266904	Body
cg20578376	L1CAM	0.503988	1.68971e-06	Body
cg10926623	L1CAM	0.350993	0.00121635	Body
cg23360700	L1CAM	0.0330381	0.766423	Body
cg03971283	L1CAM	0.235129	0.0326015	TSS200
cg09661041	L1CAM	0.590298	7.67782e-09	TSS1500
cg17994896	L1CAM	0.285588	0.00907133	TSS200
cg17488861	L1CAM	0.0620041	0.576932	Body
cg18812946	L1CAM	0.151085	0.172436	Body
cg23050981	L1CAM	0.240397	0.0288207	TSS200
cg12039689	L1CAM	0.46331	1.30408e-05	TSS1500
cg01191064	LOX	-0.0695605	0.531323	Body
cg09262269	LOX	-0.15967	0.149107	Body
cg21215899	LOX	-0.0659292	0.553014	TSS1500
cg22836153	LOX	0.0513622	0.64408	Body
cg07233159	LOX	-0.163952	0.138399	TSS1500
cg11960393	LOX	0.0666429	0.548718	TSS200
cg16274199	LOX	0.0542798	0.625352	TSS200
cg23913350	LOX	0.00344234	0.975381	TSS1500
cg08920068	LOX	-0.0540909	0.626557	TSS200
cg06508445	LOX	0.296797	0.00661956	TSS200
cg23352712	LOX	-0.0808954	0.467221	Body
cg08623535	LOX	-0.159775	0.148837	TSS1500
cg20703137	LOX	-0.157676	0.154301	TSS200
cg26422022	LOX	0.0276333	0.804149	TSS200
cg07317017	LOXL1	-0.0964485	0.384996	TSS200
cg16706749	LOXL1	-0.337098	0.00193115	Body
cg04436755	LOXL1	-0.0728979	0.511769	TSS200
cg19087463	LOXL1	0.159733	0.148945	Body
cg23689615	LOXL1	0.0129298	0.907511	Body
cg10372921	LOXL1	-0.0395869	0.721848	TSS200
cg27554189	LOXL1	-0.0315058	0.77697	Body
cg23484268	LOXL1	-0.0508795	0.647201	Body
cg00028013	LOXL1	-0.106272	0.338275	TSS200
cg02846219	LOXL1	0.0828261	0.455867	Body
cg00071887	LOXL1	-0.392385	0.000271695	TSS1500
cg08372668	LOXL1	-0.181604	0.100327	Body
cg09916599	LOXL1	-0.163889	0.138552	Body
cg19257102	LOXL1	-0.103228	0.352351	TSS1500
cg14852355	LOXL1	0.0634944	0.567794	Body
cg14435807	LOXL1	-0.101108	0.362368	TSS200
cg16581800	LOXL1	-0.33502	0.00206587	Body
cg12594244	LOXL1	-0.0906343	0.414395	TSS200
cg01652927	LOXL1	0.122896	0.26778	Body
cg10974980	LOXL1	-0.165043	0.135765	Body
cg00455362	LOXL1	0.116578	0.293299	Body
cg01349856	LOXL1	0.0223542	0.840744	Body
cg04435632	LOXL1	0.116704	0.292776	Body
cg00527825	LOXL1	-0.209059	0.0580028	TSS1500
cg19036075	LOXL1	-0.0957773	0.389061	Body
cg25738958	LOXL1	-0.105338	0.34325	Body
cg02812767	LOXL1	-0.311007	0.00436503	TSS1500
cg26457179	MAGT1	-0.0487175	0.661251	TSS200
cg23832225	MAGT1	0.0938248	0.398104	TSS200
cg24814801	MAGT1	-0.0688888	0.535303	TSS200
cg01286388	MAGT1	-0.014588	0.895703	TSS200
cg16078210	MAGT1	-0.0569875	0.608182	TSS200
cg25626441	MAGT1	0.0690987	0.534058	TSS1500
cg10526888	MAGT1	-0.0152387	0.891076	TSS200
cg07363416	MAGT1	0.0410562	0.711968	TSS200
cg09359802	MAPK8	-0.21649	0.049498	Body
cg03883275	MAPK8	0.0703581	0.526616	TSS1500
cg05241265	MAPK8	0.0653835	0.556311	Body
cg19612574	MAPK8	-0.420574	8.75784e-05	TSS1500
cg21233275	MCM6	-0.0111246	0.920388	TSS200
cg13158291	MCM6	0.0936359	0.399058	TSS1500
cg20430725	MCM6	-0.00543638	0.961085	Body
cg06536629	MCM6	0.0520549	0.639613	TSS200
cg27305063	MCM6	0.245141	0.0257414	TSS200
cg19039313	MCM6	0.0735485	0.508001	TSS1500
cg13056269	MCM6	0.0672936	0.544814	Body
cg22407744	MCM6	0.226229	0.0399373	TSS200
cg12124516	MCM6	0.214706	0.0514397	TSS200
cg27450667	MCM6	0.00990722	0.929085	TSS200
cg12250807	MCM6	0.147664	0.182447	Body
cg11446240	MCM6	-0.0689308	0.535054	Body
cg02861082	MCM6	0.100793	0.36387	Body
cg26851496	MESDC1	-0.152156	0.169388	TSS1500
cg13818726	MESDC1	0.0401856	0.718323	TSS200
cg00143527	MESDC1	-0.219827	0.0460285	TSS1500
cg10850626	MESDC1	0.341715	0.0016598	TSS1500
cg14543953	MMP1	-0.0416859	0.707748	TSS200
cg13759446	MMP1	0.0859536	0.438986	Body
cg16575408	MMP1	0.0148189	0.894061	TSS1500
cg02212280	MMP1	0.114227	0.303193	TSS1500
cg03557733	MPP2	-0.0907183	0.413961	TSS200
cg25717227	MPP2	-0.0672936	0.544814	Body
cg18439195	MPP2	0.269342	0.0140335	Body
cg26782881	MPP2	-0.364951	0.000749165	Body
cg04414683	MPP2	-0.426934	6.69451e-05	Body
cg13326508	MPP2	-0.0346753	0.755201	TSS1500
cg17552029	MPP2	-0.129822	0.24158	TSS200
cg07767963	MPP2	-0.0376349	0.735045	Body
cg20120371	MPP2	-0.167226	0.130612	Body
cg10758466	MPP2	0.444965	3.04043e-05	Body
cg20629183	MPP2	-0.134503	0.224916	TSS1500
cg01370063	MPP2	-0.246232	0.025074	Body
cg02760939	MPP2	0.0304983	0.783927	TSS200
cg17365845	NDRG1	-0.197893	0.0730016	TSS200
cg08691775	NDRG1	-0.483418	4.89164e-06	TSS1500
cg08223003	NDRG1	-0.0943495	0.395461	Body
cg07062933	NDRG1	0.183032	0.0976502	TSS1500
cg21773188	NDRG1	-0.308551	0.00469718	Body
cg18745406	NDRG1	0.0562739	0.612687	TSS1500
cg15393676	NDRG1	0.220163	0.0456908	Body
cg12876333	NEDD4L	-0.188741	0.0875014	TSS1500
cg03478631	NEDD4L	0.108035	0.330286	Body
cg16502980	NEDD4L	-0.0751438	0.498822	TSS1500
cg07023867	NEDD4L	0.0743042	0.503642	TSS1500
cg26938118	NEDD4L	-0.0611435	0.582239	Body
cg18036248	NEDD4L	-0.0106209	0.923986	Body
cg24675664	NEDD4L	-0.00203602	0.985468	TSS1500
cg00668559	NFKBIE	-0.521557	6.47888e-07	Body
cg03822267	NFKBIE	0.124281	0.262392	TSS1500
cg11913951	NFKBIE	-0.107783	0.33142	Body
cg19707503	NFKBIE	-0.186306	0.0917219	Body
cg19109431	NFKBIE	0.340603	0.00172181	TSS1500
cg06560379	NFKBIE	-0.593363	5.91919e-09	Body
cg15787744	NFKBIE	-0.308236	0.00474135	TSS1500
cg16702449	NUDT3	-0.338079	0.00177247	TSS200
cg20159193	NUDT3	-0.432371	5.2997e-05	Body
cg06526020	NUDT3	-0.333067	0.00220009	Body
cg19494811	NUDT3	-0.221884	0.0439924	Body
cg09572053	NUDT3	0.238027	0.0302436	TSS200
cg15486822	NUDT3	0.0326393	0.769164	TSS1500
cg25055477	NUDT3	0.23156	0.0353933	TSS1500
cg01537289	NUDT3	0.214559	0.0516024	Body
cg05272556	NUDT3	-0.345347	0.00147122	TSS200
cg02944057	NUDT3	0.308383	0.00472069	Body
cg19773376	NUDT3	0.239914	0.0291509	Body
cg04492847	NUPR1	-0.181709	0.100128	TSS200
cg06288570	NUPR1	-0.269405	0.0140105	TSS200
cg01542023	NUPR1	-0.250031	0.0228648	TSS200
cg16576597	NUPR1	-0.155325	0.160598	TSS1500
cg15149645	NUPR1	-0.28456	0.00933202	TSS200
cg07753203	OLFML2A	-0.085009	0.444046	TSS1500
cg05554161	OLFML2A	-0.111939	0.313029	Body
cg14405893	OLFML2A	0.0669367	0.546953	Body
cg13678899	OLFML2A	-0.093426	0.400119	Body
cg19915050	OLFML2A	-0.104215	0.347749	TSS200
cg00375250	OLFML2A	0.0635364	0.567538	Body
cg13662628	OLFML2A	0.0763822	0.491758	Body
cg26014373	OLFML2A	0.227698	0.0386388	Body
cg14462432	OLFML2A	0.140968	0.203257	Body
cg25574769	OLFML2A	-0.0180093	0.871415	Body
cg18506679	OLFML2A	0.237081	0.0311545	Body
cg00453679	PHLDA1	-0.0765711	0.490684	TSS1500
cg01245284	PHLDA1	0.241573	0.0280299	TSS1500
cg17019095	PHLDA1	-0.0131187	0.906165	TSS200
cg04939496	PLAU	-0.169346	0.125752	TSS1500
cg19939077	PPIF	-0.36048	0.000876946	Body
cg07441565	PPIF	-0.218945	0.0469247	TSS200
cg00357888	PPIF	-0.323853	0.00294615	TSS1500
cg04159077	PPIF	-0.352861	0.00114132	Body
cg27352063	PPIF	-0.198417	0.0722328	TSS200
cg11057378	PPIF	-0.0736115	0.507637	TSS200
cg14204211	PPIF	0.0923975	0.405344	TSS200
cg08514558	PPIF	-0.138995	0.209703	TSS1500
cg23585575	PPIF	-0.239683	0.02931	TSS200
cg24225147	PPIF	-0.2464	0.0249726	Body
cg09400194	PPIF	-0.0125939	0.909905	Body
cg09469691	PPIF	-0.166009	0.133467	TSS200
cg06103367	PPIF	-0.159292	0.150081	Body
cg03648155	PPIF	-0.289723	0.00808678	TSS1500
cg10835307	PPIF	-0.172117	0.119612	Body
cg18362897	PSMD10	-0.0370471	0.739034	Body
cg11728145	PXDN	-0.272575	0.012891	Body
cg23634829	PXDN	0.303388	0.00547	Body
cg00682069	PXDN	0.244049	0.0264239	Body
cg08380973	PXDN	0.374837	0.000524815	Body
cg09389557	PXDN	-0.0192897	0.862355	Body
cg09618102	PXDN	-0.162084	0.142996	Body
cg08216099	PXDN	-0.278788	0.0109208	Body
cg09118932	PXDN	-0.425948	6.98167e-05	TSS200
cg17801352	PXDN	-0.329583	0.00245938	TSS1500
cg01629007	PXDN	-0.181562	0.100407	Body
cg12495069	PXDN	0.0246631	0.824539	Body
cg01805732	PXDN	-0.280215	0.0105074	TSS1500
cg08166568	PXDN	-0.427795	6.45302e-05	Body
cg05514883	PXDN	0.359158	0.000918385	Body
cg20570797	PXDN	-0.239746	0.0292665	Body
cg16925003	PXDN	0.127115	0.251602	Body
cg18943812	PXDN	0.106671	0.336458	Body
cg14578866	PXDN	0.289702	0.00809153	Body
cg07701911	PXDN	0.440683	3.68107e-05	Body
cg04436724	PXDN	0.278557	0.010989	Body
cg18794122	PXDN	0.261198	0.0173103	Body
cg03591285	PXDN	0.287372	0.00863429	Body
cg24676303	PXDN	-0.150057	0.175402	Body
cg21647182	PXDN	-0.16475	0.13647	Body
cg00038342	PXDN	0.303703	0.00541982	Body
cg07872947	PXDN	0.232862	0.0343526	Body
cg23055707	PXDN	0.00728349	0.947854	Body
cg08534653	PXDN	-0.113681	0.305521	Body
cg19300414	PXDN	-0.380861	0.000420278	Body
cg16909084	PXDN	0.080832	0.466815	Body
cg14671764	PXDN	0.54601	1.56511e-07	Body
cg10160682	PXDN	0.0459049	0.679708	Body
cg24129977	PXDN	-0.363545	0.000787393	TSS1500
cg14994258	PXDN	0.385059	0.000359147	Body
cg07772617	PXDN	0.166765	0.131689	Body
cg14037665	PXDN	-0.383674	0.00037835	TSS1500
cg24767423	PXDN	0.173922	0.115738	Body
cg01271695	PXDN	0.0665169	0.549475	Body
cg21664909	PXDN	0.121783	0.272161	Body
cg19517718	PXDN	-0.276836	0.0115093	Body
cg09699787	PXDN	-0.18914	0.0868251	Body
cg25306511	PXDN	0.15522	0.160884	Body
cg07608848	PXDN	0.39377	0.000257551	Body
cg01928136	PXDN	0.143277	0.195897	Body
cg22648929	PXDN	0.119013	0.28328	Body
cg04409509	PXDN	0.360942	0.000862882	Body
cg06836544	PXDN	0.417447	9.97657e-05	Body
cg04014726	PXDN	0.142332	0.198885	Body
cg20417128	PXDN	0.345892	0.00144462	Body
cg05241015	PXDN	-0.229461	0.0371275	TSS1500
cg12780678	PXDN	-0.242454	0.027449	Body
cg07207923	PXDN	0.400361	0.000199107	Body
cg27472176	PXDN	0.0157634	0.887347	Body
cg23858189	PXDN	0.206603	0.061064	Body
cg09921371	PXDN	0.207506	0.0599239	Body
cg10366053	PXDN	0.0351161	0.752189	Body
cg23397325	PXDN	0.183892	0.0960637	Body
cg01454538	PXDN	-0.0255867	0.818078	Body
cg24741066	PXDN	-0.13146	0.235657	Body
cg00511632	PXDN	0.244763	0.0259759	Body
cg15796818	PXDN	0.290311	0.00795479	Body
cg27160524	PXDN	0.295873	0.00679667	Body
cg12351906	PXDN	0.369989	0.000625738	Body
cg03267487	PXDN	0.0981907	0.376438	Body
cg08084799	PXDN	0.261051	0.017375	Body
cg26381919	PXDN	0.382583	0.000394141	Body
cg26063629	PXDN	0.241887	0.0278213	Body
cg06599209	PXDN	-0.532303	3.51657e-07	Body
cg12624031	PXDN	0.191994	0.0821046	Body
cg01328473	PXDN	-0.167814	0.129251	Body
cg19769520	PXDN	0.113702	0.305431	Body
cg15914335	PXDN	0.0192477	0.862651	Body
cg14230647	PXDN	-0.00554133	0.960333	Body
cg01821226	PXDN	0.111372	0.315497	Body
cg06460400	PXDN	0.375383	0.000514445	Body
cg07029777	PXDN	-0.498384	2.27131e-06	Body
cg13663912	RAD23B	-0.132761	0.231021	TSS1500
cg25483839	RAD23B	-0.17537	0.1127	TSS1500
cg13794334	RAD23B	-0.0599051	0.589916	Body
cg13475031	RAD23B	-0.207444	0.0598673	TSS1500
cg13894624	RAD23B	-0.0841904	0.448459	Body
cg14509390	RAD23B	0.24512	0.0257544	TSS1500
cg22968991	RAD23B	0.168969	0.126608	TSS200
cg17163839	RRM1	0.0903824	0.415697	TSS1500
cg22027985	RRM1	0.230868	0.0359579	TSS1500
cg17510997	RRM1	-0.114805	0.301379	Body
cg08557956	RRM1	0.000629696	0.995557	TSS1500
cg13518437	RRM1	0.128395	0.246828	TSS1500
cg01234929	RRM1	0.0449813	0.68581	TSS200
cg26612563	RRM1	-0.146174	0.187299	TSS200
cg18678763	RRM1	-0.209752	0.0571625	TSS1500
cg17565360	RRM1	0.320872	0.00323216	TSS200
cg11833811	RRM1	0.151589	0.170996	TSS200
cg22700686	S100A2	-0.596092	4.63061e-09	TSS1500
cg23656322	S100A2	-0.107531	0.332556	Body
cg08105396	S100A2	-0.246442	0.0249474	TSS1500
cg07353685	S100A2	-0.567776	3.96003e-08	Body
cg19907725	S100A2	-0.427459	6.54628e-05	TSS1500
cg02332117	S100A2	-0.222766	0.043143	TSS1500
cg21196487	S100A2	-0.241845	0.027849	TSS1500
cg13997435	S100A2	-0.605432	1.67949e-09	TSS200
cg17107867	S100A3	-0.22031	0.0455437	TSS1500
cg06615154	S100A3	-0.201524	0.0678145	TSS1500
cg26306869	S100A3	-0.166786	0.13164	TSS1500
cg09680007	S100A3	-0.420113	8.92862e-05	TSS200
cg15026767	S100A3	-0.594664	5.27491e-09	TSS200
cg02354107	SCARB2	-0.31871	0.00345496	TSS200
cg13870520	SCARB2	0.0354099	0.750182	Body
cg13648715	SCARB2	-0.161475	0.144519	Body
cg18214799	SCARB2	-0.300449	0.00595858	TSS200
cg01624414	SCARB2	0.0150078	0.892717	Body
cg10711857	SCARB2	-0.234058	0.0334188	Body
cg19878838	SCARB2	0.00680072	0.951311	TSS1500
cg21656748	SCARB2	-0.32677	0.00268843	TSS1500
cg25841625	SCARB2	-0.000125939	0.999172	Body
cg25314266	SCARB2	0.108665	0.328137	Body
cg20666271	SCARB2	0.102158	0.358096	TSS1500
cg19050061	SCARB2	-0.0222913	0.841187	Body
cg12454419	SCARB2	0.0763612	0.491877	TSS200
cg25980392	SCARB2	-0.165779	0.134186	TSS200
cg03332188	SDF2L1	-0.22413	0.0418555	TSS200
cg13515094	SDF2L1	-0.135596	0.22161	Body
cg08524871	SDF2L1	-0.329457	0.00246925	TSS200
cg06385766	SDF2L1	-0.146048	0.187684	TSS200
cg08853539	SDF2L1	-0.462525	1.07133e-05	TSS200
cg20127188	SDF2L1	-0.18257	0.09851	TSS200
cg06983527	SDF2L1	-0.172453	0.118884	TSS1500
cg26340409	SDF2L1	0.053839	0.628166	Body
cg20585830	SDF2L1	-0.211011	0.0556603	Body
cg14575355	SDF2L1	-0.228475	0.0379669	TSS1500
cg15477600	SDF2L1	-0.0299526	0.787703	TSS1500
cg16617872	SERPINE1	-0.0819655	0.460574	Body
cg11353706	SERPINE1	0.144662	0.191575	Body
cg19722814	SERPINE1	-0.125855	0.256359	TSS1500
cg24539923	SERPINE1	-0.192855	0.0807225	TSS1500
cg12584355	SERPINE1	-0.0786071	0.479199	Body
cg20438404	SERPINE1	-0.196696	0.0747791	TSS200
cg08792542	SERPINE1	-0.00610806	0.956272	Body
cg01975495	SERPINE1	-0.141577	0.201298	Body
cg25826546	SERPINE1	-0.326225	0.00273504	TSS1500
cg17968347	SERPINE1	0.00978129	0.929985	Body
cg10552282	SLC20A1	0.22732	0.0389693	Body
cg23886783	SLC20A1	-0.00386214	0.97237	TSS1500
cg05422897	SLC20A1	0.132614	0.231542	TSS1500
cg26703507	SLC20A1	-0.357752	0.000964409	Body
cg10898730	SLC20A1	-0.255594	0.019932	Body
cg06121808	SLC20A1	-0.319529	0.00336903	Body
cg07986907	SLC20A1	-0.237501	0.0308505	Body
cg05672265	SLC20A1	0.227112	0.0389446	TSS1500
cg00151919	SLC25A15	0.00554133	0.960333	TSS1500
cg18335740	SLC25A15	0.0727719	0.5125	TSS200
cg20906753	SLC35C1	-0.366567	0.000707331	Body
cg19527995	SLC35C1	-0.0760463	0.493668	TSS1500
cg08507344	SLC35C1	-0.201125	0.0683691	Body
cg24483081	SLC35C1	-0.137001	0.216363	Body
cg17066254	SLC35C1	-0.37001	0.000625265	TSS1500
cg00306395	SLC35C1	-0.263717	0.0162326	Body
cg02176725	SLC35C1	-0.307775	0.00480681	TSS1500
cg06630241	SOCS2	-0.180681	0.10209	Body
cg11738543	SOCS2	-0.0978758	0.377976	Body
cg03327347	SOCS2	-0.157634	0.154412	TSS200
cg16019700	SOCS2	0.309937	0.00450715	TSS1500
cg13179085	SOCS2	-0.1671	0.130905	TSS1500
cg27619149	SOCS2	-0.111435	0.315222	TSS200
cg19682249	SOCS2	0.372927	0.000562641	TSS1500
cg15125424	SOCS2	-0.0877592	0.430157	TSS1500
cg07687131	SOCS2	0.00587717	0.957927	Body
cg23412850	SOCS2	-0.114521	0.301944	Body
cg24117442	SOCS2	-0.289933	0.00803942	TSS200
cg09741588	SOCS2	-0.321103	0.00320915	TSS1500
cg04797323	SOCS2	-0.0627597	0.57229	Body
cg05171933	SPINK1	0.0682873	0.539606	Body
cg07774884	STC1	-0.00587717	0.957927	TSS200
cg00410898	STC1	-0.0328072	0.76801	TSS200
cg04645534	STC1	-0.049725	0.654688	TSS1500
cg00013451	STC1	-0.265837	0.0153711	Body
cg20272884	STC1	0.105642	0.341158	TSS1500
cg04779013	SYNC	-0.120482	0.277346	TSS1500
cg15058557	SYNC	-0.160174	0.147816	TSS1500
cg24693189	SYNC	0.172201	0.119429	Body
cg12634957	SYNC	-0.231623	0.0353423	TSS1500
cg05342835	SYNC	-0.166744	0.131739	Body
cg04551500	SYNC	-0.0177574	0.873199	TSS1500
cg17339202	SYNC	-0.126947	0.252233	Body
cg24872163	SYNC	-0.0296167	0.790029	Body
cg11954384	SYNC	-0.17346	0.116719	Body
cg19296960	SYNC	-0.310167	0.00447615	TSS200
cg01293417	TAF9B	0.182255	0.0990996	Body
cg00192980	TAF9B	-0.0450653	0.685255	Body
cg18626864	TAF9B	0.0985265	0.374802	TSS200
cg24585803	TAF9B	-0.101759	0.359275	TSS200
cg05605384	TAF9B	0.142752	0.197553	TSS200
cg11859478	TAF9B	0.177386	0.108577	TSS200
cg01915804	TAF9B	0.0779774	0.482736	TSS200
cg24230696	TFF3	0.169241	0.12599	TSS1500
cg21970261	TFF3	-0.473973	7.808e-06	TSS200
cg20488657	TFF3	0.295705	0.00682932	TSS1500
cg08198280	TFF3	0.0336888	0.761957	TSS1500
cg18217706	TFF3	-0.331031	0.00234843	Body
cg15304125	TMEM30A	0.0410562	0.711968	Body
cg22277887	TMEM30A	0.214747	0.0513933	TSS200
cg18086819	TMEM30A	-0.078901	0.477553	Body
cg23790220	TMEM30A	0.0064229	0.954017	TSS200
cg22807305	TMEM30A	0.0614584	0.580295	TSS1500
cg08251064	TMEM30A	-0.140086	0.206119	TSS200
cg16714432	TMEM30A	0.0225012	0.839711	TSS200
cg11262669	TMEM30A	-0.0539338	0.628201	TSS200
cg26174387	TMEM30A	0.00155325	0.988931	TSS200
cg20527647	TMEM30A	0.0715335	0.519718	TSS1500
cg13878066	TMEM51	-0.146656	0.185475	Body
cg06349717	TMEM51	0.285169	0.00917695	Body
cg09022584	TMEM51	0.0140842	0.899288	Body
cg24435669	TMEM51	0.0137274	0.901829	Body
cg06117824	TMEM51	0.136077	0.219498	Body
cg00421693	TNFAIP8	-0.387179	0.000331491	Body
cg01810267	TNFAIP8	0.202468	0.0665154	TSS1500
cg07376834	TNFAIP8	-0.114752	0.300966	TSS1500
cg03665078	TNFAIP8	-0.408295	0.000145079	Body
cg03723497	TNFAIP8	-0.224676	0.0413495	TSS1500
cg15621656	TNFAIP8	-0.490576	3.40312e-06	Body
cg04280246	TNFAIP8	-0.305046	0.00521031	TSS200
cg00524900	TNFAIP8	-0.12363	0.264913	Body
cg07398791	TNFAIP8	-0.46925	9.81851e-06	Body
cg01915433	TNFAIP8	-0.37362	0.000548644	Body
cg19893178	TNFAIP8	-0.0230259	0.836023	Body
cg18689486	TNFAIP8	0.22986	0.0367926	TSS1500
cg14692284	TNFAIP8	-0.360123	0.000887956	Body
cg15408889	TNFAIP8	-0.358255	0.000947687	Body
cg00629563	TNFAIP8	-0.180009	0.103387	Body
cg04195774	TNFAIP8	-0.479577	5.92521e-06	Body
cg12148675	TNFAIP8	-0.160752	0.146566	Body
cg21239001	TNFAIP8	0.290248	0.00796884	Body
cg15292768	TNFAIP8	-0.171844	0.120206	Body
cg01057573	TNFAIP8	0.110113	0.321027	Body
cg21130861	TNFAIP8	0.0107468	0.923086	TSS1500
cg26305729	TNFAIP8	-0.0209899	0.850352	Body
cg04855216	TNFAIP8	-0.408778	0.000142277	Body
cg01728667	TXNIP	-0.135889	0.220603	Body
cg13305883	TXNIP	-0.0905923	0.414612	TSS200
cg17745163	TXNIP	-0.0721006	0.517147	TSS200
cg25173010	TXNIP	-0.147643	0.18251	TSS1500
cg12769891	TXNIP	-0.0671256	0.54582	TSS1500
cg00497091	TXNIP	-0.247891	0.0240883	TSS200
cg22690212	TXNIP	-0.0505859	0.649713	TSS200
cg13984512	TXNIP	-0.169346	0.125752	TSS200
cg18879829	TXNIP	-0.123546	0.26524	TSS1500
cg22221669	TXNIP	-0.214255	0.0517741	TSS200
cg19301058	TXNIP	-0.109357	0.324374	TSS200
cg22525212	TXNIP	-0.359536	0.000906367	TSS1500
cg15894431	YAP1	0.0988629	0.373893	TSS200
cg09612099	YAP1	-0.253705	0.0208895	Body
cg15448495	YAP1	0.0424835	0.702415	TSS200
cg14304702	YAP1	-0.0992192	0.371441	Body
cg00064284	YAP1	-0.0802023	0.470302	TSS200
cg12697442	YAP1	-0.21968	0.0461769	TSS200
cg05260877	YAP1	-0.179778	0.103835	Body
cg16416793	YAP1	-0.0859746	0.438874	TSS200
cg01442799	YAP1	0.083036	0.454723	TSS200
cg19298498	YAP1	0.182549	0.0985492	Body
cg20782778	YAP1	-0.186222	0.0918703	Body
cg05819150	YAP1	-0.289115	0.00822553	TSS1500
cg26608694	YAP1	0.041455	0.709294	Body
cg17630771	YAP1	0.266655	0.0150492	TSS1500
cg19154027	YAP1	-0.279627	0.0106759	Body
cg20989729	YAP1	-0.109273	0.324748	TSS200
cg22104427	YAP1	0.241636	0.0279881	Body
cg15999356	YAP1	-0.0443096	0.690261	Body
cg13927387	YAP1	0.0571764	0.606992	TSS1500
cg19033875	ZNF395	-0.0203392	0.854942	TSS1500
cg13098621	ZNF395	0.0282944	0.799204	TSS200
cg01719123	ZNF395	0.151589	0.170996	TSS200
cg17199018	ZNF395	0.193716	0.0793591	Body
cg00987379	ZNF395	-0.340771	0.00171231	TSS1500
cg12832228	ZNF395	0.194366	0.0783405	TSS200
cg07006853	ZNF395	-0.296083	0.00675605	TSS1500
cg10627155	ZNF395	-0.350271	0.00116951	TSS200
cg02318596	ZNF654	0.23559	0.0322541	TSS200
cg04383352	ZNF654	0.289618	0.00811056	TSS1500
cg13760105	ZNF654	0.122077	0.270999	TSS1500
cg07464212	ADD3	0.108728	0.327181	Body
cg16320159	ADD3	0.11557	0.297513	TSS200
cg24780263	ALDOA	-0.106587	0.33684	TSS1500
cg01667953	ALDOA	-0.285672	0.00905034	Body
cg07742718	ALDOA	-0.158201	0.152922	TSS1500
cg14501061	ALDOC	-0.414676	0.000111861	TSS200
cg15692239	ALDOC	-0.410604	0.000132126	TSS200
cg13990559	ALDOC	-0.376978	0.0004852	TSS200
cg02344926	ALDOC	-0.451954	2.21388e-05	TSS200
cg27183188	ALDOC	-0.473385	8.03519e-06	TSS200
cg14668747	ALDOC	-0.46967	9.62177e-06	TSS200
cg27370759	ALDOC	0.131271	0.236335	Body
cg13344757	ALDOC	-0.457894	1.68212e-05	TSS1500
cg22622440	ALKBH5	-0.132677	0.231319	Body
cg05395061	ALKBH5	-0.115864	0.29628	TSS200
cg27376072	ALKBH5	-0.217959	0.0479448	Body
cg22247039	ALKBH5	-0.203371	0.0652929	TSS200
cg07166550	ALKBH5	-0.0998699	0.3683	Body
cg00591342	ALKBH5	0.283573	0.00958824	TSS1500
cg13204529	ALKBH5	-0.234563	0.0328069	TSS200
cg14715602	ALKBH5	-0.276302	0.0114557	Body
cg14515250	ALKBH5	-0.171802	0.120298	TSS1500
cg17865108	ALKBH5	0.277696	0.0112465	TSS200
cg04904530	ALKBH5	-0.142682	0.198171	TSS1500
cg20309353	ALKBH5	-0.198228	0.0725088	Body
cg00163199	ALKBH5	-0.070589	0.525257	Body
cg24318076	ALKBH5	-0.00134335	0.990437	Body
cg09745160	ALKBH5	0.327612	0.00250013	TSS200
cg24470119	ANGPTL4	-0.136875	0.216789	Body
cg10811474	ANGPTL4	-0.194157	0.0786096	TSS1500
cg17695543	ANGPTL4	-0.193716	0.0793591	Body
cg16745616	ANGPTL4	0.105075	0.343765	TSS200
cg17793059	ANGPTL4	-0.0391042	0.725104	TSS200
cg00209893	ANKZF1	0.191491	0.0829224	Body
cg02220837	BHLHE40	-0.611981	5.28923e-10	Body
cg19972858	BHLHE40	0.095399	0.390208	TSS200
cg03598297	BHLHE40	-0.610176	7.91079e-10	Body
cg26269881	BHLHE40	-0.534151	3.15961e-07	Body
cg21223075	BHLHE40	-0.149133	0.178097	TSS1500
cg12591404	BHLHE40	0.0385061	0.729632	TSS1500
cg18768347	BHLHE40	-0.601822	2.59687e-09	Body
cg14814876	BHLHE40	0.116662	0.29295	TSS1500
cg18279467	BHLHE40	-0.204714	0.0635074	TSS200
cg20971407	BHLHE40	-0.557722	7.59296e-08	Body
cg15564948	BHLHE40	-0.097414	0.380239	Body
cg01180628	BHLHE40	-0.597288	4.13685e-09	Body
cg14508890	BHLHE40	-0.32675	0.00269021	TSS1500
cg01864791	BHLHE40	-0.563096	5.38361e-08	Body
cg08587820	BHLHE40	-0.282524	0.00986757	TSS200
cg26344982	BHLHE40	-0.615088	1.57095e-10	Body
cg16739118	BHLHE41	-0.216616	0.0493632	Body
cg10447982	BHLHE41	-0.270811	0.0135037	TSS1500
cg05232853	BHLHE41	-0.245708	0.025393	Body
cg08715914	BHLHE41	0.087066	0.433067	TSS200
cg05568797	BHLHE41	-0.288947	0.00826417	Body
cg15117548	BHLHE41	0.0517298	0.642329	TSS1500
cg19243777	BHLHE41	-0.283363	0.00964354	TSS1500
cg10049913	BHLHE41	-0.233324	0.0339896	Body
cg02429656	BHLHE41	-0.314386	0.00394229	Body
cg21335266	BHLHE41	-0.249759	0.0230178	TSS1500
cg16592121	BNIP3	-0.402376	0.000183855	Body
cg21762589	BNIP3	-0.0923765	0.405451	TSS1500
cg08079580	BNIP3	-0.0918307	0.40824	TSS1500
cg02886408	BNIP3	-0.220164	0.0455021	TSS1500
cg25123362	BNIP3	-0.175979	0.111442	Body
cg23606392	BNIP3	-0.0749339	0.500025	Body
cg02038273	BNIP3	-0.355988	0.00102508	Body
cg20216030	BNIP3	4.19798e-05	0.999774	Body
cg25233900	BNIP3	-0.152617	0.168086	Body
cg23468137	BNIP3	0.0312329	0.778852	Body
cg12751948	BNIP3	-0.398619	0.000213229	Body
cg02365648	BNIP3	-0.0211368	0.849316	Body
cg06147895	BNIP3	-0.246778	0.0247459	Body
cg03157531	BNIP3	-0.104068	0.348432	Body
cg02388416	BNIP3	-0.0443306	0.690122	TSS1500
cg02835981	BNIP3	-0.0888292	0.423782	TSS1500
cg19935431	BNIP3	0.031149	0.779432	Body
cg22473973	BNIP3	-0.274128	0.0123714	Body
cg27353308	BNIP3	-0.109273	0.324748	TSS1500
cg19708903	BNIP3	-0.000713656	0.994955	Body
cg09656274	BNIP3	-0.00631795	0.954769	Body
cg11356398	BNIP3	-0.275219	0.0120173	Body
cg06082745	BNIP3	-0.155934	0.15895	Body
cg19436700	BNIP3	-0.273099	0.0127134	Body
cg10206933	BNIP3	0.114353	0.302657	Body
cg23471067	BNIP3	-0.147559	0.182761	Body
cg18679487	BNIP3	-0.267474	0.0147332	Body
cg13599131	BNIP3	-0.0690987	0.534058	TSS1500
cg11197015	BNIP3	-0.239707	0.0290621	TSS1500
cg05762616	BNIP3	-0.110743	0.318254	Body
cg12338214	BNIP3	-0.218505	0.0473782	Body
cg07143043	BNIP3	-0.161013	0.145682	Body
cg15390444	BNIP3	-0.169325	0.1258	Body
cg18477674	BNIP3	-0.143382	0.195567	Body
cg23883215	BNIP3L	0.164855	0.136218	TSS200
cg13516551	BNIP3L	0.0181143	0.870671	Body
cg15157360	BNIP3L	0.0258805	0.816024	Body
cg11498726	BNIP3L	0.135175	0.222593	Body
cg22816343	BNIP3L	-0.122602	0.268932	Body
cg25191983	BNIP3L	0.0839385	0.449821	TSS1500
cg01706566	BNIP3L	-0.265312	0.0155806	TSS1500
cg13553693	BNIP3L	0.0696864	0.530578	Body
cg02464098	BNIP3L	-0.078754	0.478376	TSS1500
cg05232067	BNIP3L	0.0499139	0.653461	Body
cg03359468	BNIP3L	0.00701062	0.949808	TSS200
cg13160058	BNIP3L	-0.108098	0.330003	Body
cg21997857	C4orf3	0.146887	0.184778	TSS1500
cg19443556	C4orf3	0.262478	0.016755	TSS1500
cg13938361	CA9	-0.0880945	0.427637	Body
cg14563831	CA9	-0.116809	0.292339	Body
cg13849253	CA9	0.256979	0.019254	Body
cg09566069	CA9	0.182297	0.0990209	Body
cg06908460	CA9	0.254292	0.0205875	Body
cg19257550	CA9	-0.325028	0.00283977	TSS200
cg16291276	CD34	-0.089144	0.422136	Body
cg09788693	CD34	-0.00333739	0.976133	Body
cg03583857	CD34	-0.155304	0.160655	TSS1500
cg02852407	CD34	-0.0732127	0.509944	TSS1500
cg20293352	CD34	-0.0741573	0.504488	TSS1500
cg27566858	CD34	-0.239411	0.0294989	Body
cg01566217	CD34	0.0431972	0.697656	Body
cg21697512	CD34	-0.0868771	0.434069	Body
cg26266618	CD34	-0.0958188	0.388118	TSS1500
cg04197452	CD34	-0.155367	0.160484	Body
cg20627971	CD59	-0.152722	0.167791	TSS1500
cg23254918	CD59	0.220331	0.0455227	TSS200
cg16568681	CD59	-0.126191	0.255085	TSS1500
cg24453664	CD59	-0.118173	0.286709	TSS1500
cg19776272	CD59	-0.0678603	0.541426	TSS200
cg02224369	CD59	-0.0775576	0.485101	TSS1500
cg24871046	CD59	-0.0658033	0.553774	TSS200
cg26271948	CD59	0.205722	0.0621945	TSS200
cg13707768	CDC42EP2	-0.213614	0.0526583	TSS1500
cg11770667	CDC42EP2	-0.171613	0.120711	Body
cg09354949	CDC42EP2	-0.0243483	0.826745	Body
cg18770660	CDC42EP2	0.0451282	0.684838	TSS1500
cg01710158	CDC42EP2	-0.0396079	0.721707	TSS1500
cg09258981	CDC42EP2	0.100709	0.364272	Body
cg01630869	CDC42EP2	0.0397338	0.720858	TSS1500
cg05759269	CDKN1A	-0.168843	0.126894	TSS1500
cg11920449	CDKN1A	0.00478569	0.965749	TSS1500
cg26500144	CDKN1A	0.199614	0.0705044	TSS200
cg18900812	CDKN1A	-0.230469	0.0362864	TSS1500
cg11706349	CDKN1A	-0.169178	0.126132	TSS1500
cg15474579	CDKN1A	0.0918937	0.407918	TSS1500
cg23305046	CDKN1A	-0.24724	0.0244711	TSS1500
cg05460965	CDKN1A	-0.316527	0.00369379	TSS1500
cg13662121	CDKN1A	-0.0722682	0.51543	TSS1500
cg04214946	CDKN1A	-0.166135	0.13317	Body
cg04806553	CDKN1A	0.016561	0.881683	Body
cg24425727	CDKN1A	-0.124533	0.26142	TSS1500
cg09774179	CDKN1A	-0.0920616	0.407059	Body
cg23239078	CDKN1C	-0.0327652	0.768298	TSS1500
cg25215340	CDKN1C	0.16687	0.131444	TSS200
cg27002185	CDKN1C	0.113639	0.3057	TSS200
cg23904595	CDKN1C	0.187545	0.0895556	TSS1500
cg23225147	CDKN1C	-0.105327	0.342605	TSS1500
cg04402633	CDKN1C	-0.0462197	0.677632	TSS200
cg21799346	CDKN1C	-0.192939	0.0805887	Body
cg13216372	CDKN1C	0.124155	0.262879	TSS1500
cg05559445	CDKN1C	-0.0737375	0.506909	TSS1500
cg20492951	CDKN1C	0.235066	0.0326491	TSS200
cg06281850	CDKN1C	0.117354	0.290079	TSS1500
cg05267118	CDKN1C	0.107699	0.331799	TSS1500
cg14598198	CDKN1C	-0.127315	0.251391	TSS200
cg08206623	CDKN1C	0.352252	0.00116529	TSS1500
cg06191719	CDKN1C	0.0508692	0.647881	TSS1500
cg10929140	CDKN1C	0.0292599	0.792502	TSS1500
cg01294058	CDKN1C	-0.145355	0.189439	Body
cg00374747	CDKN1C	0.0378867	0.733338	TSS1500
cg26718354	CDKN1C	0.0883578	0.427006	TSS200
cg11744767	CDKN1C	-0.0637253	0.566385	TSS1500
cg05383783	CDKN1C	-0.162672	0.141538	TSS1500
cg26932552	CDKN1C	0.082774	0.456907	TSS200
cg06662685	CDKN1C	0.160636	0.14664	TSS200
cg17434043	CDKN1C	0.0678183	0.541676	TSS200
cg11399776	CDKN1C	0.0588976	0.596196	TSS1500
cg05090695	CDKN1C	-0.104005	0.348725	TSS1500
cg23146358	CDKN1C	-0.0962596	0.385931	Body
cg22123387	CLDN4	-0.487532	3.97443e-06	TSS1500
cg10393875	CLDN4	-0.403321	0.000177084	TSS1500
cg12448161	COL7A1	-0.0238235	0.830424	TSS200
cg27507687	COL7A1	0.0368792	0.740175	Body
cg00178511	COL7A1	-0.13232	0.232584	TSS200
cg21567371	COL7A1	0.0840645	0.44914	Body
cg14957943	COL7A1	-0.219407	0.0464535	TSS200
cg14364903	COL7A1	-0.0692246	0.533311	Body
cg00057231	COL7A1	-0.102976	0.353532	Body
cg16357381	COL7A1	-0.0692246	0.533311	TSS1500
cg18656024	COL7A1	-0.240334	0.0288636	TSS1500
cg08772752	COL7A1	0.0357669	0.7482	TSS200
cg23328613	COL7A1	-0.126212	0.255005	TSS1500
cg00158683	COL7A1	-0.0277698	0.803202	TSS200
cg03548224	COL7A1	-0.163196	0.140245	Body
cg07157951	COL7A1	0.15648	0.157483	Body
cg17183531	COL7A1	-0.137778	0.213751	Body
cg08977790	COL7A1	-0.243504	0.0267709	TSS1500
cg26035625	CSRNP1	-0.365707	0.000729332	TSS1500
cg02254461	CSRNP1	-0.0314219	0.777549	TSS1500
cg00330958	CSRNP1	-0.195269	0.0769451	Body
cg19538674	CSRNP1	-0.0812099	0.46473	Body
cg15317522	CSRNP1	-0.266877	0.0147319	TSS200
cg26164440	CSRNP1	-0.146761	0.185158	TSS1500
cg17451457	CSRNP1	-0.0217875	0.844732	Body
cg20173072	CSRP2	-0.143551	0.195427	TSS1500
cg09874177	CSRP2	-0.239558	0.029397	TSS200
cg01473602	CSRP2	-0.107867	0.331042	Body
cg14405753	CSRP2	-0.429411	6.02129e-05	TSS1500
cg21484956	CSRP2	-0.549956	1.23103e-07	TSS1500
cg10582318	CSRP2	-0.170921	0.122234	TSS1500
cg24007917	CSRP2	-0.00182612	0.986974	TSS200
cg21678795	CSRP2	-0.095504	0.389685	TSS200
cg00331237	CSRP2	-0.464632	1.22475e-05	TSS1500
cg12606399	CTH	0.0917048	0.408886	TSS200
cg26802294	CTH	-0.181982	0.0996129	TSS200
cg14830466	CTH	0.33672	0.00195504	TSS1500
cg02917772	CTH	0.127199	0.251287	TSS1500
cg26890010	CTH	0.0531674	0.632465	TSS200
cg26933368	CTH	0.316485	0.00369853	TSS1500
cg00968021	CTH	-0.157214	0.155524	TSS200
cg21921513	CTH	-0.0438898	0.693048	TSS200
cg03755098	CTH	-0.124754	0.261131	TSS1500
cg10497720	CTH	-0.0314745	0.777585	TSS200
cg12311057	CXCR4	-0.0425994	0.702174	TSS200
cg00591844	CXCR4	-0.0988414	0.373272	TSS200
cg26425669	CXCR4	0.0651946	0.557454	TSS200
cg20366284	CXCR4	-0.0706628	0.525559	TSS1500
cg06332859	CXCR4	-0.171403	0.121171	TSS1500
cg06679534	CXCR4	-0.0964485	0.384996	TSS1500
cg04513185	CXCR4	-0.000944545	0.993298	TSS1500
cg20823742	CXCR4	0.0887452	0.424221	TSS200
cg21859434	CXCR4	-0.0671047	0.545946	TSS1500
cg16675708	CXCR4	-0.0708618	0.523654	Body
cg03101422	CXCR4	-0.122476	0.269427	TSS1500
cg22376465	CXCR4	-0.00533143	0.961837	Body
cg17398233	CXCR4	-0.196738	0.0747162	TSS1500
cg13854983	CXCR4	-0.10073	0.364171	Body
cg16924061	CYB5A	-0.522543	6.13041e-07	Body
cg21951216	CYB5A	-0.191827	0.0823765	Body
cg27662877	CYB5A	-0.155661	0.159687	TSS1500
cg07544653	CYB5A	-0.231204	0.0356832	TSS200
cg22456192	CYB5A	-0.173481	0.116674	TSS1500
cg05471090	CYB5A	-0.0978758	0.377976	TSS1500
cg21899520	CYB5A	-0.632593	2e-12	Body
cg24304618	CYB5A	-0.0078922	0.943497	TSS200
cg20256961	CYB5A	-0.15946	0.149648	TSS200
cg25481635	CYB5A	-0.320578	0.00326167	TSS200
cg23780514	CYB5A	-0.223018	0.0429029	TSS200
cg23685965	CYB5A	-0.20547	0.0625206	Body
cg07380506	CYP1B1	-0.0462617	0.677355	TSS200
cg00565882	CYP1B1	-0.366315	0.000713707	Body
cg07057636	CYP1B1	-0.210969	0.0557098	TSS200
cg08761102	CYP1B1	-0.0510054	0.646386	TSS1500
cg05062676	CYP1B1	-0.528231	4.44302e-07	TSS1500
cg09799983	CYP1B1	-0.422211	8.17651e-05	Body
cg20254225	CYP1B1	-0.456593	1.78718e-05	Body
cg23549225	CYP1B1	-0.356072	0.00102211	TSS1500
cg03648789	CYP1B1	-0.158222	0.152867	TSS1500
cg22488859	CYP1B1	0.222451	0.0434448	TSS1500
cg06861880	CYP1B1	-0.339176	0.00180443	TSS1500
cg24720192	CYP1B1	0.0176107	0.874441	TSS1500
cg14407177	CYP1B1	-0.50508	1.59424e-06	Body
cg16060486	CYP1B1	-0.143866	0.194436	TSS200
cg26036993	CYP1B1	-0.160006	0.148245	TSS1500
cg01936270	CYP1B1	-0.0758364	0.494864	TSS1500
cg01410359	CYP1B1	-0.430901	5.64721e-05	Body
cg02162897	CYP1B1	-0.432748	5.21362e-05	Body
cg07301433	CYP1B1	0.00821758	0.941224	TSS1500
cg08620474	CYP1B1	-0.18045	0.102534	TSS1500
cg12802310	CYP1B1	-0.586646	1.02963e-08	TSS1500
cg09130556	CYP1B1	0.165169	0.135464	TSS1500
cg16248783	CYP1B1	-0.305214	0.00518464	TSS1500
cg09456297	CYP1B1	-0.170996	0.122194	TSS1500
cg03890222	CYP1B1	-0.399941	0.000202429	Body
cg06264984	CYP1B1	-0.437975	4.14911e-05	Body
cg19452060	DDIT3	0.102808	0.35432	TSS1500
cg15055395	DDIT3	-0.170984	0.122095	TSS200
cg17703658	DDIT3	-0.122287	0.270171	TSS200
cg08984436	DDIT3	-0.18553	0.0931015	TSS200
cg07092057	DDIT3	0.0200243	0.857164	TSS200
cg13148824	DDIT3	-0.184144	0.0956032	TSS1500
cg07708937	DDIT3	-0.0644599	0.561911	TSS200
cg08446255	DPYSL2	-0.0962601	0.386663	TSS1500
cg19610383	DPYSL2	-0.0555812	0.617074	Body
cg18825258	DPYSL2	-0.140611	0.204412	TSS200
cg02835343	DPYSL2	-0.109315	0.324561	Body
cg22308941	DPYSL2	0.163952	0.138399	TSS1500
cg22294804	DPYSL2	0.16221	0.142683	Body
cg00926238	DPYSL2	-0.0333529	0.764261	Body
cg11537607	DPYSL2	0.115025	0.299812	Body
cg07581623	DPYSL2	-0.388964	0.000309751	Body
cg10789956	DPYSL2	-0.331241	0.00233273	Body
cg12037509	DPYSL2	0.117858	0.288002	Body
cg00470636	DPYSL2	-0.467571	1.06439e-05	Body
cg06435374	DPYSL2	-0.139079	0.209425	Body
cg10399402	DPYSL2	-0.0406784	0.714504	Body
cg12393552	DPYSL2	0.00264473	0.981102	Body
cg00441434	DPYSL2	-0.199593	0.0705344	TSS1500
cg03245229	DPYSL2	-0.154045	0.164107	Body
cg06250135	DPYSL2	-0.103102	0.352941	Body
cg22544144	DPYSL2	-0.0805172	0.468557	TSS200
cg08216304	DPYSL2	-0.207002	0.0605581	Body
cg00718883	DPYSL2	-0.23091	0.0359234	Body
cg12097896	DPYSL2	0.0109987	0.921287	Body
cg12024050	DPYSL2	0.0902355	0.416458	TSS200
cg24811472	DPYSL2	-0.0429033	0.699614	Body
cg04138376	DPYSL2	0.0300155	0.787267	TSS200
cg10368981	DPYSL2	-0.0991142	0.371949	TSS200
cg17759595	DPYSL2	0.11557	0.297513	Body
cg14967899	DPYSL2	0.238571	0.0300867	TSS1500
cg10537936	DUSP3	-0.0465556	0.675421	Body
cg18936378	DUSP3	0.264053	0.0160934	Body
cg04726090	DUSP3	-0.151379	0.171595	Body
cg12784120	DUSP3	-0.0843373	0.447665	Body
cg03864245	DUSP3	0.132425	0.232212	Body
cg20150904	DUSP3	0.159166	0.150407	Body
cg06823651	EDN1	-0.0695395	0.531447	TSS200
cg11585301	EDN1	-0.103207	0.352449	TSS200
cg14244360	EDN1	-0.10942	0.324094	TSS200
cg08291302	EDN1	-0.106293	0.338179	TSS200
cg16537245	EDN1	-0.0723105	0.515924	TSS1500
cg27565517	EDN1	-0.297091	0.00656407	Body
cg24244437	EDN1	-0.0170228	0.878407	TSS1500
cg07714708	EDN1	-0.150162	0.175097	TSS200
cg25559625	EDN1	-0.237647	0.0307447	TSS1500
cg06058618	EFNA3	0.0642081	0.563443	Body
cg05813084	EFNA3	-0.0216196	0.845915	Body
cg10317026	EFNA3	-0.381743	0.000406698	Body
cg00267713	EFNA3	-0.0357878	0.747605	Body
cg10954985	EFNA3	-0.301373	0.005801	TSS200
cg08185345	EFNA3	-0.488456	3.79214e-06	Body
cg10516701	EFNA3	0.0282734	0.79935	Body
cg06787675	EFNA3	-0.485811	4.33642e-06	Body
cg13096820	EFNA3	-0.0919471	0.408391	Body
cg05788417	EFNA3	-0.100101	0.367189	Body
cg10143807	EFNA3	-0.365644	0.000730967	TSS1500
cg00449821	EFNA3	-0.454053	2.01017e-05	Body
cg12741345	EFNA3	-0.249276	0.0232904	Body
cg07196758	EFNA3	0.277087	0.0114318	Body
cg11688696	EFNA3	-0.318584	0.00346835	Body
cg25745642	EFNA3	-0.328177	0.00257161	TSS1500
cg16257681	EFNA3	-0.0895638	0.419947	Body
cg27045062	EFNA3	-0.218463	0.0474216	Body
cg11750116	EFNA3	-0.035221	0.751472	Body
cg18828883	EFNA3	0.0801394	0.470652	Body
cg17222196	EFNA3	0.264871	0.0157584	Body
cg17582777	EFNA3	-0.35771	0.000965815	TSS1500
cg08242010	EFNA3	-0.551698	1.10599e-07	Body
cg00145979	EFNA3	0.315268	0.00383821	Body
cg14848832	EFNA3	0.165022	0.135815	Body
cg06096015	EGLN1	0.168213	0.128333	Body
cg21875980	EGLN1	0.0735066	0.508243	Body
cg27510275	EGLN1	-0.0151337	0.891822	Body
cg07040244	EGLN1	-0.2023	0.0667448	Body
cg20015535	EGLN1	-0.235129	0.0326015	Body
cg16855929	EGLN1	-0.0400907	0.718455	TSS1500
cg20682143	EGLN1	0.117208	0.290686	TSS1500
cg15928900	EGLN3	-0.0469754	0.67266	TSS200
cg07019438	EGLN3	-0.225599	0.0405049	Body
cg04194821	EGLN3	-0.305025	0.00521353	Body
cg04118888	EGLN3	-0.190588	0.0844038	TSS200
cg24665290	EGLN3	-0.0732127	0.509944	TSS200
cg19548652	EGLN3	-0.271987	0.0130925	Body
cg08122140	EGLN3	-0.0266991	0.81031	TSS200
cg22832061	EGLN3	-0.0836447	0.451414	TSS200
cg15631323	EGLN3	-0.0735905	0.507758	TSS200
cg24170040	EGLN3	-0.169053	0.126418	Body
cg08568549	EHD2	0.229692	0.0369333	Body
cg19925124	EHD2	0.0638722	0.565489	Body
cg13953735	EHD2	-0.0411612	0.711264	Body
cg14043593	EHD2	0.190105	0.0852049	Body
cg08663152	EHD2	-0.0993451	0.370831	Body
cg24865623	EHD2	0.267096	0.0148783	Body
cg12603043	EHD2	-0.406322	0.00015707	TSS200
cg09320690	EHD2	-0.278851	0.0109023	TSS200
cg10257729	EHD2	-0.221128	0.0447315	TSS200
cg10170949	EHD2	0.172117	0.119612	Body
cg22359581	EHD2	-0.181017	0.101446	Body
cg08330432	EHD2	0.0268671	0.809139	Body
cg16860712	EHD2	0.0452962	0.683728	Body
cg26036443	EHD2	-0.337559	0.00190232	TSS200
cg09377572	EHD2	0.350447	0.0012391	Body
cg11356571	EHD2	0.225683	0.0404288	Body
cg02531908	ENO2	-0.173923	0.115836	TSS200
cg23199063	ENO2	-0.146782	0.185094	TSS200
cg19594606	ENO2	-0.382583	0.000394141	TSS200
cg27528330	ENO2	-0.171928	0.120023	Body
cg22977254	ENO2	-0.194954	0.0774296	TSS200
cg17303299	ENO2	-0.171026	0.122003	TSS200
cg19560758	ERRFI1	0.0277486	0.802999	TSS1500
cg19922442	ERRFI1	0.0972881	0.380857	TSS200
cg06159484	ERRFI1	-0.543848	1.78263e-07	TSS1500
cg13808198	ERRFI1	-0.51146	1.13059e-06	TSS1500
cg03335216	ERRFI1	0.17197	0.119932	TSS1500
cg22122925	ERRFI1	-0.465828	1.1569e-05	Body
cg22678073	ERRFI1	-0.525797	5.10285e-07	TSS1500
cg16509192	FAM162A	0.0688048	0.535801	Body
cg01151821	FBXO32	-0.160216	0.147709	TSS1500
cg15307908	FBXO32	0.150341	0.174901	TSS200
cg16903025	FBXO32	-0.560577	6.33198e-08	Body
cg08297140	FBXO32	0.00751438	0.946201	TSS1500
cg06050341	FBXO32	-0.367323	0.000688516	Body
cg23202949	FBXO32	-0.288842	0.0082884	Body
cg23287229	FBXO32	-0.661538	2e-12	Body
cg03023681	FBXO32	-0.762604	2e-12	Body
cg01007029	FBXO32	0.0842958	0.448646	TSS200
cg12508214	FBXO32	-0.0778305	0.483563	TSS200
cg19888535	FBXO32	-0.180555	0.102332	TSS200
cg23868899	FBXO32	0.0278117	0.80291	TSS200
cg15838173	FUT11	-0.210771	0.0557942	Body
cg25295726	FUT11	-0.0437639	0.693885	TSS200
cg02566518	FUT11	-0.264997	0.0157074	TSS200
cg05099600	FUT11	-0.157445	0.154912	TSS200
cg19442545	FUT11	-0.244511	0.0261333	Body
cg04320760	FUT11	-0.123924	0.263773	Body
cg17426063	FUT11	-0.0723105	0.515924	TSS200
cg19270251	FUT11	-0.238646	0.0298036	TSS200
cg23231163	FUT11	-0.246946	0.0246456	Body
cg12419678	FUT11	-0.0506276	0.648831	Body
cg01906879	GBE1	0.194891	0.0775268	TSS200
cg08887093	GBE1	0.102263	0.356891	Body
cg03829176	GBE1	-0.161927	0.143597	Body
cg04989674	GBE1	-0.197095	0.0741828	TSS200
cg11625933	GBE1	-0.421225	8.52234e-05	TSS1500
cg14465376	GBE1	-0.249801	0.0229942	Body
cg02395434	GBE1	0.161349	0.144836	Body
cg05141432	GBE1	0.246211	0.0250867	TSS1500
cg02980152	GBE1	0.022858	0.837203	TSS200
cg03785807	GBE1	-0.131334	0.236109	TSS200
cg21897315	GBE1	-0.334726	0.00208559	TSS1500
cg11306767	GLRX	-0.670459	2e-12	Body
cg10949007	GLRX	-0.503694	1.71633e-06	TSS1500
cg22689909	GLRX	-0.495886	2.58746e-06	TSS1500
cg16677191	GLRX	-0.514021	9.83196e-07	TSS1500
cg19789021	GLRX	-0.172306	0.119202	Body
cg03852144	GLRX	-0.503274	1.75503e-06	TSS1500
cg26829318	GLRX	-0.271915	0.012892	Body
cg22775896	GM2A	-0.120073	0.279587	TSS1500
cg18701481	GM2A	-0.220426	0.0452388	TSS200
cg02086387	GM2A	-0.108959	0.326823	TSS200
cg10657547	GM2A	-0.119306	0.282087	TSS1500
cg03568287	GM2A	-0.119716	0.281029	TSS1500
cg02359181	GPI	-0.336993	0.00193776	Body
cg00759906	GPI	0.252466	0.0215384	Body
cg07913310	GPI	0.215797	0.0502445	Body
cg07843120	GPI	-0.122875	0.267862	Body
cg17575314	HK1	-0.0380756	0.732058	Body
cg06748146	HK1	-0.142689	0.197752	Body
cg23196783	HK1	-0.0524747	0.636912	Body
cg17283083	HK1	-0.106062	0.339234	Body
ch.10.1464434F	HK1	-0.21416	0.052046	Body
cg14543941	HK1	0.0612695	0.581461	Body
cg06214126	HK1	-0.164645	0.136723	Body
cg16001913	HK1	-0.162651	0.14159	TSS200
cg13189759	HK1	0.0963226	0.385619	Body
cg19170991	HK1	-0.198291	0.0724167	Body
cg00542261	HK1	-0.285211	0.00916634	Body
cg13763181	HK1	-0.127975	0.248386	Body
cg15358372	HK1	-0.0847781	0.445288	Body
cg19297537	HK1	-0.0128248	0.908259	Body
cg20746134	HK1	-0.0682381	0.539173	Body
cg06834661	HK1	-0.145271	0.189697	Body
cg12213850	HK1	0.0836027	0.451641	Body
cg22679940	HK1	-0.363818	0.000779839	Body
cg24699895	HK1	-0.0720583	0.516653	Body
cg08546229	HK1	-0.291235	0.0077512	Body
cg00210249	HK1	-0.0740313	0.505214	Body
cg08567142	HK1	-0.149679	0.176501	Body
cg20372666	HK1	-0.309643	0.00454687	Body
cg24806675	HK2	0.16349	0.139525	Body
cg09485063	HK2	0.143697	0.19458	Body
cg08813379	HK2	-0.108844	0.327339	Body
cg20520115	HK2	-0.366861	0.000699959	Body
ch.2.1701371R	HK2	-0.155913	0.159006	Body
cg20913831	HK2	0.0653625	0.556438	Body
cg11672772	HK2	-0.191239	0.0833337	Body
cg19000349	HK2	0.205323	0.0627115	Body
cg01200965	HK2	-0.0701272	0.527976	Body
cg03958956	HK2	0.0173167	0.876323	Body
cg01175605	HK2	-0.0381806	0.731348	Body
cg09742442	HK2	-0.0324923	0.770175	Body
cg12077754	HK2	-0.0575123	0.604878	Body
cg02593989	HK2	-0.434407	4.85104e-05	Body
cg17766062	HK2	0.254292	0.0205875	Body
cg14453704	HK2	0.38142	0.000374122	Body
cg27049094	HK2	0.0163721	0.883024	Body
cg12292402	HSPH1	-0.024978	0.822335	TSS1500
cg26946276	HSPH1	0.216133	0.0498814	TSS200
cg09556825	HSPH1	0.16158	0.144256	TSS200
cg10362742	HSPH1	-0.189392	0.0864001	TSS200
cg01634268	HSPH1	0.0369842	0.739462	TSS200
cg02394989	HSPH1	0.111204	0.316231	TSS200
cg07705315	HSPH1	0.0410562	0.711968	TSS1500
cg04459413	HSPH1	0.0106419	0.923836	TSS1500
cg19890264	HSPH1	0.0183661	0.868888	TSS200
cg03373442	HSPH1	0.318396	0.00348853	TSS1500
cg02318347	HSPH1	0.149522	0.177288	Body
cg02309157	HSPH1	-0.284119	0.00944575	Body
cg16666935	HSPH1	0.36111	0.000857819	TSS200
cg23210278	INHA	0.0895428	0.420056	Body
cg02043077	INSIG2	0.44551	2.96673e-05	TSS1500
cg22650315	INSIG2	0.0167709	0.880194	TSS1500
cg05226506	INSIG2	-0.115906	0.296104	TSS1500
cg25805739	INSIG2	-0.250369	0.0224384	TSS200
cg27584647	INSIG2	-0.11366	0.30561	Body
cg14705142	INSIG2	-0.212629	0.0536203	TSS200
cg05944800	INSIG2	-0.200999	0.068545	TSS1500
cg06733439	INSIG2	-0.115046	0.299723	TSS200
cg09536782	INSIG2	-0.0806012	0.468092	TSS1500
cg24171875	INSIG2	0.385143	0.000358012	TSS200
cg16542977	JMJD6	-0.422799	7.97674e-05	Body
cg12418947	KCTD11	0.0655094	0.555549	TSS200
cg07639694	KCTD11	0.0592334	0.594099	TSS1500
cg22084563	KCTD11	0.0863633	0.437556	TSS200
cg02152982	KDM3A	-0.101297	0.361468	TSS1500
cg20951334	KDM3A	0.243231	0.0269458	Body
cg00352005	KDM3A	0.164771	0.13642	Body
cg22094163	KDM3A	0.0325763	0.769597	Body
cg02972551	KDM3A	0.268943	0.0141804	TSS1500
cg01744130	KDM3A	-0.0380127	0.732485	TSS1500
cg07032309	KLF10	0.268314	0.0144151	TSS200
cg00697125	KLF10	-0.0988414	0.373272	TSS200
cg23425764	KLF10	-0.0280005	0.801247	TSS1500
cg07028608	KLF10	-0.218106	0.0477917	TSS200
cg16481024	KLF10	0.111015	0.317057	TSS200
cg16588302	KLF10	0.0395449	0.722131	TSS1500
cg15825175	KLF10	0.0590865	0.595016	TSS200
cg01366085	KLF10	0.158935	0.151005	TSS1500
cg26535606	KLF10	0.0446665	0.687895	Body
cg07065941	KLF10	0.127808	0.249544	Body
cg00178429	KLF10	-0.0210738	0.84976	TSS1500
cg10929761	KLF10	-0.16857	0.127516	TSS200
cg05861291	KLF7	-0.0468284	0.673626	Body
cg10278149	KLF7	0.228244	0.0381656	Body
cg26887632	KLF7	-0.191387	0.0830541	TSS1500
cg02577773	KLF7	-0.391042	0.000286091	Body
cg08478189	KLF7	0.0528315	0.63462	TSS200
cg20302165	KLF7	0.0470593	0.672109	TSS1500
cg01070657	KLF7	0.153247	0.166322	Body
cg19361800	KLF7	0.185593	0.0929891	Body
cg21777553	KLF7	-0.195164	0.0771063	Body
cg03484267	KLF7	0.18236	0.0989028	Body
cg21294960	KLF7	0.047773	0.667427	Body
cg21246614	KLF7	0.0253769	0.81986	TSS1500
cg08515841	KLF7	-0.179925	0.10355	Body
cg03003394	KLF7	-0.225242	0.0408295	Body
cg03944810	KLF7	-0.162567	0.141797	TSS1500
cg06916059	KLF7	-0.0648587	0.559489	Body
cg03770147	KLF7	0.0647958	0.559871	Body
cg18206459	KLF7	-0.146405	0.186596	TSS200
cg02607779	KLF7	0.110722	0.318346	TSS200
cg05214708	KLF7	0.237459	0.0308808	Body
cg23729050	KLF7	-0.287351	0.00863932	TSS200
cg06728437	KLF7	-0.0945174	0.394618	TSS1500
cg22902535	KLF7	0.159229	0.150244	TSS1500
cg04396539	KLF7	-0.144746	0.191315	TSS1500
cg15058605	KLF7	-0.128479	0.246517	TSS1500
cg12251895	KLF7	0.0154695	0.889435	Body
cg00307497	KLF7	-0.0323244	0.77133	Body
cg03578041	LARP6	-0.0462407	0.677494	TSS1500
cg27427527	LARP6	-0.0909072	0.412986	TSS1500
cg16077257	LARP6	-0.0691617	0.533684	TSS1500
cg03320521	LARP6	0.18597	0.0923165	Body
cg22696438	LARP6	-0.240796	0.0285503	TSS200
cg25959239	LARP6	-0.350468	0.00123822	TSS200
cg00020175	LARP6	0.194765	0.0777214	Body
cg06121816	LARP6	0.382079	0.000401632	Body
cg26653147	LARP6	-0.414844	0.000111091	TSS1500
cg06132502	LARP6	-0.262206	0.016872	Body
cg06477663	LCP1	-0.439696	3.84557e-05	TSS1500
cg02479468	LCP1	-0.0820704	0.459999	Body
cg10983853	LCP1	0.282881	0.0097718	Body
cg11274337	LCP1	0.405231	0.000164092	Body
cg04341806	LCP1	-0.427627	6.49949e-05	TSS1500
cg03628148	LDHA	-0.0140003	0.899886	TSS200
cg03177631	LDHA	0.280341	0.0104716	TSS200
cg09436562	LDHA	0.0209479	0.850648	TSS200
cg19631472	LDHA	-0.253831	0.0208245	TSS1500
cg15700009	LDHA	-0.214685	0.0514629	TSS1500
cg07187103	LDHA	-0.106913	0.336045	TSS200
cg03641722	LDHA	-0.241489	0.0280858	Body
cg13190306	LDHA	-0.0169388	0.879002	TSS200
cg08125181	LIMCH1	-0.376978	0.0004852	TSS1500
cg03822934	LIMCH1	0.365707	0.000729332	Body
cg22659049	LIMCH1	0.0525167	0.636642	Body
cg20253212	LIMCH1	0.431006	5.6217e-05	Body
cg09491068	LIMCH1	0.188636	0.0876801	Body
cg24136314	LIMCH1	0.139709	0.207355	Body
cg09950011	LIMCH1	0.245015	0.0258194	Body
cg15232654	LIMCH1	-0.216448	0.049543	Body
cg25150953	LIMCH1	0.218505	0.0473782	Body
cg23291145	LIMCH1	-0.0252928	0.820132	Body
cg13578194	LIMCH1	-0.52374	5.73163e-07	Body
cg03605284	LIMCH1	0.18278	0.0981185	Body
cg06663149	LIMCH1	-0.141241	0.202377	Body
cg02738272	LIMCH1	0.016561	0.881683	Body
cg03174768	LIMCH1	-0.0451282	0.684838	Body
cg05779148	LIMCH1	0.220478	0.0453761	Body
cg11803251	LIMCH1	-0.266467	0.015123	Body
cg03704407	LIMCH1	0.196612	0.0749051	Body
cg22594201	LIMCH1	0.230847	0.0359751	Body
cg11076306	LIMCH1	-0.220142	0.0457119	Body
cg18744777	LIMCH1	0.279606	0.010682	Body
cg08817120	LIMCH1	-0.213572	0.0527056	Body
cg01578293	LIMCH1	0.0221023	0.842516	Body
cg21337826	LIMCH1	-0.126548	0.253735	Body
cg22204103	LIMCH1	0.16666	0.131935	Body
cg26187965	LIMCH1	0.136623	0.217642	Body
cg15162330	LIMCH1	-0.480186	5.74873e-06	Body
cg25289973	LIMCH1	-0.193086	0.0803549	TSS1500
cg14531530	LIMCH1	-0.268251	0.0144387	TSS1500
cg04609245	LIMCH1	0.292011	0.00758358	Body
cg11036041	LIMCH1	-0.210025	0.0568342	Body
cg09018824	LIMCH1	-0.415663	0.000107406	TSS1500
cg02381227	LIMCH1	0.252949	0.0212834	Body
cg12623695	LRP8	-0.0420637	0.70522	Body
cg03938516	LRP8	-0.322447	0.00307814	Body
cg03366858	LRP8	-0.0610386	0.582888	Body
cg10311602	LRP8	-0.342051	0.00164148	Body
cg17095731	LRP8	-0.0280845	0.800664	TSS1500
cg18202502	LRP8	0.155976	0.158837	Body
cg04154290	LRP8	0.0946854	0.393775	TSS1500
cg26191586	LRP8	0.122413	0.269675	TSS1500
cg22819171	LRP8	-0.134083	0.226377	Body
cg11662671	LRP8	-0.0670417	0.546324	Body
cg23205521	LRP8	-0.123295	0.266221	Body
cg11950754	LRP8	-0.485496	4.40592e-06	Body
cg00228689	LRP8	-0.380735	0.000422251	Body
cg04997235	LRP8	-0.314135	0.00397248	Body
cg16145137	LRP8	0.144851	0.190991	Body
cg19745317	LRP8	-0.23112	0.0357517	Body
cg00956091	LRP8	0.126002	0.255801	Body
cg14843868	LRP8	0.1677	0.129671	Body
cg04483460	LRP8	-0.399479	0.000206141	Body
cg24553773	LRP8	-0.303199	0.0055003	Body
cg19729914	LRP8	-0.167835	0.129202	Body
cg26653725	MAP2K3	-0.240587	0.0284588	TSS200
cg11972062	MAP2K3	-0.100584	0.364874	Body
cg14636712	MAP2K3	0.0419905	0.706236	TSS1500
cg07154956	MAP2K3	-0.245036	0.0258064	TSS200
cg26694616	MAP2K3	-0.232559	0.0343722	TSS200
cg07862083	MAP2K3	-0.0321355	0.772631	TSS200
cg20744152	MAP2K3	-0.0111246	0.920388	TSS200
cg25677314	MAP2K3	-0.026972	0.808408	Body
cg26695387	MAP2K3	-0.0154695	0.889435	Body
cg00229232	MAP2K3	-0.290773	0.00785241	TSS1500
cg25538809	MAP2K3	-0.0813988	0.463689	TSS1500
cg23537517	MAP2K3	-0.269345	0.013804	TSS200
cg11469540	MAP2K3	-0.0180093	0.871415	Body
cg15416179	MAP2K3	-0.256771	0.0191167	Body
cg10065520	MAP2K3	0.00665379	0.952363	Body
cg09419402	MAP2K3	0.0318417	0.774655	TSS200
cg13484608	MAP2K3	0.212565	0.0538523	Body
cg05679521	MAP2K3	-0.225872	0.0402581	Body
cg16597437	MAP2K3	-0.129403	0.243116	Body
cg11056409	MBOAT2	-0.209731	0.0571878	Body
cg21992696	MBOAT2	0.215818	0.0502217	Body
cg15311822	MBOAT2	-0.320159	0.00330424	TSS1500
cg21547649	MBOAT2	-0.475589	7.21402e-06	Body
cg02699694	MBOAT2	0.00478569	0.965749	TSS1500
cg07960067	MBOAT2	-0.0637673	0.566129	TSS1500
cg08430813	MBOAT2	-0.0304143	0.784508	Body
cg27306119	MBOAT2	-0.427933	5.44967e-05	TSS1500
cg25371267	MBOAT2	0.340204	0.00174454	Body
cg23418201	MBOAT2	-0.235108	0.0326173	Body
cg07327417	MBOAT2	0.0863734	0.436747	Body
cg23725024	MBOAT2	-0.219512	0.0463469	Body
cg02727227	MBOAT2	-0.152471	0.168499	TSS1500
cg20295816	MBOAT2	-0.126653	0.253339	Body
cg27638713	MCM3	0.137022	0.216292	Body
cg14961550	MCM3	-0.0609546	0.583407	TSS200
cg21858961	MCM3	-0.510537	1.18871e-06	Body
cg01347798	MCM3	0.175454	0.112526	Body
cg17468268	MCM3	0.280572	0.0104062	TSS200
cg02243303	MCM3	-0.522375	6.18845e-07	Body
cg25420070	MCM3	0.164162	0.137889	TSS200
ch.6.1232832R	MCM3	-0.0975195	0.380452	Body
cg07837434	MCM3	0.0439738	0.692491	TSS200
cg14550653	MCM3	-0.0678183	0.541676	TSS200
cg07418892	MCM3	0.304647	0.00527175	TSS1500
cg01547142	MCM5	0.0815667	0.462765	Body
cg22071311	MCM5	-0.250178	0.0227829	TSS200
cg20358124	MCM5	-0.0528945	0.634215	Body
cg20162146	MCM5	0.0333319	0.764405	TSS1500
cg01458283	MCM5	-0.260484	0.0176266	Body
cg01910197	MCM5	-0.125834	0.256439	TSS200
cg22716904	MCM5	-0.15373	0.164979	TSS200
cg11013355	MCM5	0.00390412	0.972069	Body
cg07494617	MCM5	-0.0295747	0.790319	Body
cg10224311	MCM5	-0.022732	0.838088	Body
cg08152263	MCM5	0.113639	0.3057	TSS1500
cg04528632	MCM5	0.295265	0.00691568	TSS200
cg00199549	MCM5	0.0306452	0.782911	TSS1500
cg22929219	MCM5	0.274255	0.0121074	TSS200
cg04903157	MCM5	0.233282	0.0340225	TSS200
cg12738349	MIF	0.0508165	0.647608	TSS1500
cg07205460	MIF	-0.0268463	0.80962	TSS200
cg19307651	MIF	-0.0336678	0.762101	TSS200
cg01585852	MIF	0.149889	0.17589	TSS1500
cg20377673	MIF	0.192414	0.0814281	TSS1500
cg05241025	MIF	0.144935	0.190731	Body
cg14740204	MIF	0.112989	0.308492	TSS200
cg02877808	MIF	-0.179841	0.103713	TSS200
cg12137194	MIF	-0.280815	0.0101256	TSS200
cg24197888	NFIL3	-0.137652	0.214173	TSS1500
cg01243848	NFIL3	-0.198471	0.0720705	TSS200
cg13413755	NFIL3	-0.0456113	0.68221	TSS1500
cg15417498	NFIL3	0.0493472	0.657146	TSS1500
cg15919045	NFIL3	-0.251375	0.0221246	TSS1500
cg01154445	NRP2	-0.499265	2.16872e-06	Body
cg02183001	NRP2	-0.130872	0.237772	Body
cg14157435	NRP2	0.161328	0.144889	Body
cg23038014	NRP2	-0.057995	0.601846	Body
cg17455088	NRP2	-0.255636	0.0199112	Body
cg24551917	NRP2	-0.261723	0.0170808	Body
cg05025612	NRP2	0.406385	0.000156674	Body
cg22367989	NRP2	-0.0758784	0.494625	TSS1500
cg14150327	NRP2	-0.124555	0.2619	TSS200
cg26422981	NRP2	-0.315037	0.00386523	Body
cg11114141	NRP2	0.143109	0.196426	Body
cg10307632	NRP2	0.0279585	0.801539	Body
cg19731541	NRP2	-0.514798	9.42221e-07	Body
cg12452788	NRP2	0.0515512	0.64286	Body
cg06285439	NRP2	-0.202846	0.0660014	Body
cg02185666	NRP2	-0.295957	0.0067804	Body
cg01323148	NRP2	-0.328135	0.00257503	Body
cg05348875	NRP2	0.251879	0.0218524	Body
cg09343667	NRP2	-0.275282	0.0119972	Body
cg24319718	NRP2	0.0847991	0.445175	TSS1500
cg04471779	NRP2	-0.0940976	0.396728	Body
cg02911957	NRP2	0.154297	0.163413	Body
cg19795793	NRP2	-0.293565	0.00725792	Body
cg14158558	NRP2	0.08503	0.443933	Body
cg10648139	NRP2	-0.34308	0.00158652	Body
cg25292468	NRP2	-0.106943	0.335217	Body
cg10118547	NRP2	0.00222493	0.984113	TSS200
cg11793701	NRP2	-0.143949	0.194175	TSS200
cg22233579	NRP2	0.286659	0.00880683	Body
cg03141944	NRP2	0.0987784	0.373577	Body
cg05264870	NRP2	-0.0053944	0.961386	Body
cg04768970	NRP2	0.202489	0.0664867	TSS1500
cg22308949	NRP2	0.301646	0.00575516	Body
cg01631497	NRP2	-0.38487	0.000361712	Body
cg08001824	NRP2	0.120377	0.277767	Body
cg03261633	OBSL1	0.047815	0.667152	Body
cg00389406	OBSL1	-0.0730868	0.510674	Body
cg04447708	OBSL1	0.174237	0.115072	Body
cg09571314	OBSL1	0.0354099	0.750182	Body
cg10091487	OBSL1	0.0861215	0.438089	Body
cg04414095	OBSL1	-0.103543	0.350878	Body
cg00452266	OBSL1	0.291109	0.00777869	Body
cg25492803	OBSL1	0.172474	0.118838	Body
cg15768886	OBSL1	0.207464	0.0599766	Body
cg02527669	OBSL1	-0.27904	0.0108468	Body
cg16507172	OBSL1	0.108161	0.32972	Body
cg11989421	OBSL1	0.0895428	0.420056	Body
cg05521175	OBSL1	-0.254628	0.0204166	Body
cg09457121	OBSL1	0.163805	0.138756	Body
cg13782090	OBSL1	0.147412	0.183201	Body
cg14281087	OBSL1	0.260799	0.0174865	Body
cg15021439	OBSL1	-0.131774	0.23453	Body
cg24412960	OBSL1	0.223185	0.0427434	Body
cg09310186	OBSL1	0.238193	0.0303544	Body
cg07265985	OBSL1	0.164267	0.137635	Body
cg09367696	OBSL1	0.147034	0.184335	Body
cg11531021	OBSL1	-0.00268673	0.980768	Body
cg01072658	OBSL1	0.0613744	0.580813	Body
cg07673376	OBSL1	0.119915	0.279625	Body
cg16909579	OBSL1	0.321187	0.00320082	Body
cg20962039	OBSL1	0.0873389	0.431623	Body
cg08294017	OBSL1	-0.0501029	0.652234	Body
cg21674813	OBSL1	0.128584	0.246129	Body
cg22212691	OBSL1	-0.204819	0.0633696	Body
cg25683963	OBSL1	-0.153163	0.166556	Body
cg03046424	OBSL1	0.362957	0.000803891	Body
cg13000039	OBSL1	0.0835817	0.451755	Body
cg02938449	OBSL1	0.0923345	0.405665	Body
cg07758790	OBSL1	-0.0688678	0.535427	Body
cg14535068	OBSL1	0.0247051	0.824245	Body
cg02815900	ORAI3	-0.299064	0.00620206	TSS200
cg07406296	ORAI3	-0.123127	0.266877	TSS200
cg07693974	ORAI3	-0.224424	0.0415824	Body
cg18427589	ORAI3	-0.448176	2.63012e-05	TSS200
cg27396583	ORAI3	-0.189245	0.0866478	TSS200
cg08799467	ORAI3	0.0100961	0.927735	Body
cg09113850	ORAI3	-0.333235	0.00218824	TSS200
cg09566302	ORAI3	0.375215	0.000517615	Body
cg11276456	P4HA1	-0.229566	0.0370391	TSS200
cg14256136	P4HA1	-0.216154	0.0498588	TSS200
cg00481081	P4HA1	0.186747	0.0909461	TSS200
cg02021694	P4HA1	-0.152785	0.167614	TSS200
cg14112978	P4HA1	-0.0777465	0.484036	Body
cg18195276	P4HA1	0.0247471	0.823951	TSS1500
cg02254798	P4HA1	0.0364384	0.743173	TSS1500
cg18148452	P4HA1	-0.00640191	0.954167	TSS200
cg25778027	P4HA1	0.156752	0.156753	TSS1500
cg05191729	P4HA1	-0.0932066	0.401974	TSS1500
cg05470666	P4HA1	-0.0353996	0.750702	TSS200
cg25351996	P4HA2	-0.204735	0.0634798	TSS1500
cg05501285	P4HA2	-0.25213	0.0217174	TSS1500
cg23176873	P4HA2	0.310965	0.00437053	Body
cg16205897	P4HA2	-0.093405	0.400225	TSS1500
cg05209330	P4HA2	-0.179925	0.10355	Body
cg22598563	P4HA2	-0.0791109	0.47638	TSS1500
cg20131596	PAM	-0.401788	0.000188188	TSS1500
cg17407629	PAM	0.155766	0.159403	TSS1500
cg11098622	PAM	0.132551	0.231765	Body
cg04227789	PAM	-0.0429873	0.699055	TSS200
cg27327508	PAM	0.302086	0.00568179	Body
cg12183978	PAM	-0.0273708	0.805629	Body
cg23021168	PAM	-0.327757	0.002606	TSS1500
cg20655220	PAM	-0.080853	0.466699	Body
cg15999165	PAM	-0.253474	0.0210092	TSS200
cg24990612	PDGFB	-0.355653	0.00103702	TSS200
cg02065750	PDGFB	0.0341505	0.758793	Body
cg25676471	PDGFB	0.0547416	0.622409	Body
cg02075970	PDGFB	0.171655	0.120619	Body
cg10136216	PDGFB	0.120881	0.27575	Body
cg12019806	PDGFB	0.0668948	0.547205	Body
cg09167117	PDGFB	0.00260275	0.981403	TSS1500
cg13250388	PDGFB	0.00516351	0.963041	TSS200
cg06544464	PDGFB	0.0606398	0.585357	Body
cg19353578	PDGFB	0.0937828	0.398315	Body
cg02120463	PDGFB	-0.240577	0.028466	Body
cg20773033	PDGFB	-0.0238655	0.830129	Body
cg15402232	PDGFB	0.0295118	0.790756	Body
cg08255187	PDGFB	-0.0678603	0.541426	Body
cg18045556	PDGFB	0.0513203	0.644351	Body
cg01293532	PDGFB	0.137295	0.215372	TSS200
cg17961378	PDGFB	-0.284938	0.0092355	TSS200
cg18598016	PDGFB	-0.257756	0.0188827	TSS200
cg01100330	PDGFB	0.0440788	0.691794	Body
cg13879875	PDGFB	-0.0278116	0.802561	TSS200
cg10093934	PDK1	-0.0413711	0.709857	Body
cg21044834	PDK1	-0.0215356	0.846506	TSS1500
cg02493614	PDK1	-0.142941	0.196956	Body
cg17679246	PDK1	0.117858	0.288002	TSS1500
cg11787262	PDK1	-0.0516351	0.642318	TSS200
cg10165864	PDK1	-0.134944	0.22339	TSS1500
cg12971660	PDK1	0.14481	0.191495	Body
cg17386128	PDK1	-0.184333	0.0952589	TSS1500
cg14999931	PFKFB3	-0.10497	0.34425	Body
cg26870438	PFKFB3	-0.0708828	0.523531	TSS1500
cg24740195	PFKFB3	-0.177973	0.107397	TSS1500
cg04799588	PFKFB3	0.312057	0.0042296	Body
cg05686026	PFKFB3	-0.193569	0.0795906	Body
cg16546349	PFKFB3	-0.00314848	0.977488	Body
cg13782176	PFKFB3	-0.0805592	0.468324	Body
cg03555710	PFKFB3	0.100332	0.366081	Body
cg04430797	PFKFB3	-0.0537761	0.628569	Body
cg09097341	PFKFB3	-0.216007	0.0500173	Body
cg00890632	PFKFB3	0.0545947	0.623345	Body
cg08994060	PFKFB3	0.089312	0.421259	Body
cg07902545	PFKFB3	0.0599471	0.589655	Body
cg03124510	PFKFB3	-0.129717	0.241964	Body
cg16179674	PFKFB3	-0.132572	0.23169	Body
cg00122944	PFKFB3	0.0824063	0.45816	Body
cg16805065	PFKFB3	0.0658872	0.553267	Body
cg08745329	PFKFB3	-0.20589	0.0619779	Body
cg23278365	PFKFB3	-0.125478	0.257798	Body
cg07641567	PFKFB3	-0.163595	0.139268	Body
cg10923346	PFKFB3	-0.196604	0.0748452	TSS200
cg24171294	PFKFB3	-0.190399	0.0847166	Body
cg12235073	PFKFB3	-0.102829	0.354222	Body
cg13874629	PFKFB3	-0.034644	0.755855	TSS200
cg10552184	PFKFB3	0.0412871	0.710419	Body
cg02804289	PFKFB3	0.0786911	0.478728	Body
cg19801868	PFKFB3	-0.0405944	0.715068	TSS1500
cg22692545	PFKFB3	-0.0862474	0.437418	TSS1500
cg05521261	PFKFB3	-0.0894169	0.420712	Body
cg03261682	PFKFB3	0.0964275	0.3851	Body
cg14038949	PFKFB3	0.138596	0.211023	Body
cg19084628	PFKFB3	-0.0410982	0.711686	Body
cg19473021	PFKFB3	0.0770329	0.488067	Body
cg13316404	PFKFB3	-0.0326812	0.768876	Body
cg08289056	PFKFB3	-0.0163721	0.883024	Body
cg00902516	PFKFB3	0.0160573	0.885259	Body
cg27545615	PFKFB3	-0.122581	0.269015	Body
cg03683171	PFKFB3	-0.108287	0.329155	Body
cg15795838	PFKFB3	-0.0385164	0.729075	Body
cg27476893	PFKFB3	-0.0452962	0.683728	Body
cg04328219	PFKFB3	-0.0434281	0.696119	Body
cg01467100	PFKFB3	-0.0425885	0.701715	Body
cg25371538	PFKFB3	-0.21926	0.046603	TSS200
cg05988988	PFKFB3	-0.131019	0.237242	Body
cg05014727	PFKFB3	0.13337	0.228875	Body
cg22750548	PFKFB3	-0.020738	0.852128	Body
cg27199172	PFKFB3	-0.142554	0.198581	TSS200
cg26464252	PFKFB3	-0.0498935	0.654199	TSS200
cg26262157	PFKFB3	0.0822803	0.458849	Body
cg05716278	PFKFB3	0.119432	0.281576	Body
cg00872580	PFKFB3	0.0844843	0.446872	Body
cg24666756	PFKFB3	0.029113	0.793521	Body
cg18262201	PFKFB3	-0.162923	0.140916	Body
cg18989491	PFKFB3	-0.051845	0.640965	TSS1500
cg19705197	PFKFB3	-0.13826	0.212139	Body
cg24283621	PFKFB3	-0.0737375	0.506909	Body
cg17545652	PFKFB3	-0.188384	0.0881101	Body
cg20732160	PFKFB4	-0.0408463	0.713376	Body
cg19348001	PFKFB4	-0.00925654	0.933736	TSS1500
cg01364498	PFKFB4	-0.0340036	0.759799	TSS200
cg10319474	PFKFB4	-0.194555	0.0780468	Body
cg10107836	PFKFB4	0.0278116	0.802561	TSS1500
cg25845890	PFKFB4	0.0826372	0.456898	Body
cg14564247	PFKFB4	0.0659922	0.552634	TSS1500
cg04876072	PFKFB4	0.0341715	0.758649	TSS200
cg08568670	PFKFB4	-0.144662	0.191575	Body
cg16902559	PFKFB4	0.0569036	0.608711	TSS200
cg00706444	PFKFB4	-0.127975	0.248386	TSS1500
cg17281763	PFKFB4	0.0336996	0.762311	TSS200
cg04498104	PFKFB4	-0.0285043	0.797746	Body
cg14592491	PFKFB4	-0.328588	0.00242242	TSS200
cg12444076	PFKL	0.107825	0.331231	Body
cg05129930	PFKL	0.181122	0.101245	TSS200
cg08866402	PFKL	0.352966	0.00113723	TSS200
cg03731862	PFKL	-0.263948	0.0161368	Body
cg25322642	PFKL	-0.225536	0.040562	Body
cg03257916	PFKL	-0.00188909	0.986522	Body
cg25526717	PFKL	-0.108308	0.329738	TSS1500
cg21275663	PFKL	0.0817766	0.461611	Body
cg17375083	PFKL	-0.301897	0.00571313	Body
cg18558420	PFKL	0.211641	0.0549214	Body
cg22980722	PFKL	-0.195616	0.0763471	TSS200
cg20410173	PFKL	-0.3855	0.000353227	Body
cg19199752	PFKL	0.0969523	0.382509	Body
cg27060104	PFKL	-0.157067	0.155914	Body
cg20845748	PFKL	-0.135784	0.220503	TSS200
cg21069494	PFKL	-0.10623	0.338467	Body
cg04643920	PFKL	-0.0804752	0.468789	Body
cg19973121	PFKL	-0.162504	0.141953	Body
cg07044006	PFKL	-0.176462	0.110452	Body
cg14148108	PFKL	-0.310587	0.00442028	Body
cg12384262	PFKL	-0.0696864	0.530578	Body
cg06463313	PFKL	-0.0897947	0.418745	Body
cg14049741	PFKL	-0.300377	0.00579628	Body
cg15829622	PFKL	-0.0391461	0.724821	Body
cg01152711	PFKL	-0.30408	0.00536015	Body
cg00502028	PFKL	-0.33588	0.00200908	Body
cg16369235	PFKL	0.0266362	0.810749	TSS1500
cg08042487	PFKL	0.140506	0.204753	Body
cg09274658	PFKL	-0.242706	0.0272849	Body
cg11940177	PGAM1	-0.211221	0.0554131	Body
cg25603927	PGAM1	-0.0724361	0.514453	TSS1500
cg07151406	PGAM1	0.0365014	0.742744	TSS1500
cg00313973	PGAM1	-0.0474791	0.669353	Body
cg21245135	PGAM1	-0.259288	0.0181682	Body
cg05835744	PGAM1	-0.145124	0.190149	TSS200
cg02660350	PGAM1	-0.137988	0.213489	TSS200
cg05336550	PGAM1	0.000514255	0.996319	TSS200
cg18268492	PGAM1	0.097603	0.379312	TSS200
cg07221526	PGAM1	0.0911801	0.411581	TSS1500
cg23923462	PGAM1	-0.00245582	0.982457	TSS200
cg07464201	PGF	-0.127409	0.250501	TSS1500
cg02074930	PGF	-0.0512993	0.644486	TSS1500
cg19959591	PGF	-0.0363125	0.74403	TSS1500
cg00795000	PGF	-0.0105159	0.924735	TSS1500
cg12841020	PGF	-0.0350531	0.752619	TSS1500
cg10990040	PGF	0.30026	0.00599127	TSS1500
cg24192328	PGF	0.143781	0.194317	TSS200
cg13203541	PGK1	-0.0371521	0.738321	TSS1500
cg07781082	PGK1	-0.0897527	0.418964	TSS200
cg10560144	PGK1	-0.223185	0.0427434	TSS1500
cg26744454	PGK1	-0.0182612	0.869631	TSS200
cg15418221	PGK1	-0.0702112	0.527481	TSS200
cg09790289	PGK1	-0.0529785	0.633677	TSS200
cg00832270	PGK1	-0.00562529	0.959732	TSS200
cg08955859	PGK1	-0.143403	0.195501	Body
cg20203466	PGK1	-0.193128	0.0802882	Body
cg00151234	PGK1	-0.201482	0.0678727	TSS1500
cg14794494	PGK1	-0.0243483	0.826745	TSS200
cg25471740	PGM1	0.0342975	0.757787	Body
cg22624827	PGM1	-0.542987	1.8769e-07	TSS1500
cg05270688	PGM1	0.151107	0.172688	Body
cg04562755	PGM1	0.0528945	0.634215	Body
cg24370698	PGM1	-0.527623	4.59995e-07	TSS1500
cg25064458	PGM1	0.121615	0.272826	Body
cg20252015	PGM1	0.312539	0.00416858	Body
cg24585453	PGM1	-0.403195	0.000177974	TSS1500
cg04104489	PGM1	-0.0778095	0.483681	Body
cg03373115	PGM1	-0.122077	0.270999	TSS200
cg25013852	PGM1	-0.0149028	0.893464	TSS200
cg15472170	PLOD1	0.148	0.181446	Body
cg24490600	PLOD1	-0.000503757	0.996461	Body
cg03529003	PLOD1	-0.171949	0.119977	TSS1500
cg07810114	PLOD1	0.258847	0.0183713	Body
cg17243540	PLOD1	0.181437	0.100646	Body
cg08864318	PLOD1	-0.309454	0.00457258	Body
cg02101693	PLOD1	0.122938	0.267616	TSS1500
cg05155371	PLOD1	0.0755636	0.496422	TSS200
cg00114393	PLOD2	-0.461232	1.43856e-05	TSS200
cg06180356	PLOD2	-0.638932	2e-12	TSS1500
cg24291309	PLOD2	0.416754	0.00010267	Body
cg18986651	PLOD2	-0.205071	0.0630399	Body
cg08204129	PLOD2	-0.120251	0.278273	Body
cg24790788	PLOD2	-0.53054	3.89267e-07	TSS1500
cg17817709	PLOD2	-0.155199	0.160941	Body
cg00506629	PLOD2	-0.1777	0.107944	Body
cg18532215	PLOD2	-0.51421	9.73077e-07	TSS1500
cg02802029	PLOD2	-0.546178	1.54931e-07	TSS1500
cg22234419	PLOD2	-0.578439	1.90062e-08	Body
cg10557828	PLOD2	-0.455145	1.91132e-05	TSS1500
cg18543991	PLOD2	-0.379329	0.000444877	Body
cg22793735	PLOD2	-0.300575	0.00593687	Body
cg06823247	PNRC1	0.197662	0.0733419	TSS200
cg02383008	PNRC1	-0.0507325	0.648152	TSS200
cg09475510	PNRC1	0.0164457	0.882686	TSS200
cg09326812	PNRC1	-0.130369	0.240105	Body
cg00200298	PNRC1	0.147748	0.182197	TSS200
cg14579997	PNRC1	-0.203917	0.0645627	Body
cg21288889	PNRC1	-0.14928	0.177666	Body
cg18317589	PNRC1	-0.0251459	0.82116	TSS1500
cg03553547	PNRC1	0.0609966	0.583148	Body
cg19448269	PNRC1	0.0837706	0.450731	TSS200
cg14084623	PPFIA4	0.0226061	0.838973	Body
cg11656175	PPFIA4	0.28647	0.00885301	Body
cg00805880	PPFIA4	0.256496	0.019488	Body
cg19824396	PPFIA4	0.214622	0.0515326	TSS1500
cg09122593	PPFIA4	0.443915	3.18701e-05	TSS200
cg04914198	PPFIA4	0.303115	0.00551381	TSS1500
cg09396704	PPFIA4	0.241027	0.0283947	Body
cg01781649	PPFIA4	-0.0119013	0.914845	Body
cg03511671	PPFIA4	0.415117	0.00010985	TSS1500
cg17862152	PPFIA4	0.277381	0.011342	Body
cg03900565	PPFIA4	0.0364384	0.743173	Body
cg18169013	PPFIA4	0.209059	0.0580028	Body
cg15618108	PPFIA4	0.242706	0.0272849	Body
cg02479986	PPFIA4	0.218358	0.0475302	Body
cg00964446	PPFIA4	0.178918	0.105522	Body
cg14640592	PPFIA4	0.192708	0.0809572	Body
cg26840757	PPME1	0.1815	0.100526	Body
cg21017752	PPP1R3C	-0.237144	0.0311087	TSS1500
cg12486537	PPP1R3C	-0.230364	0.0363732	TSS200
cg18644675	PPP1R3C	-0.322573	0.00306611	TSS200
cg18354248	PPP1R3C	0.0442047	0.690958	Body
cg06051961	PPP1R3C	-0.259057	0.0182744	TSS1500
cg19902394	PPP1R3C	-0.101864	0.358777	TSS1500
cg20475550	PPP1R3C	-0.44062	3.69137e-05	Body
cg14037652	PPP1R3C	0.00321145	0.977037	Body
cg00830735	PPP1R3C	-0.253306	0.0210966	TSS1500
cg10974128	PPP1R3C	-0.143781	0.194317	TSS1500
cg20114113	PPP1R3C	-0.31636	0.00371276	Body
cg26667395	PPP1R3C	-0.530939	3.80441e-07	Body
cg26448681	PPP1R3C	-0.130977	0.237393	TSS200
cg04839761	PPP1R3C	-0.275282	0.0119972	TSS1500
cg23909584	PPP1R3C	-0.424793	7.33228e-05	Body
cg07640747	PPP1R3C	-0.35624	0.00101621	TSS200
cg24288527	PPP1R3C	-0.0134545	0.903772	Body
cg27333993	RBM3	0.232337	0.0347691	TSS200
cg03128268	RBM3	0.0327862	0.768154	TSS1500
[truncated: 249 more rows]
